# Supplementary material for: Synthesis and Evaluation of Marine-Inspired Compounds Result in Hybrids with Antitrypanosomal and Antileishmanial Activities
Source: MDPI journal article supplement (doi:10.3390/md21110551), 2023-10-24
Supplement: s1 [file s1]

## Supplementary Material

### **Synthesis and evaluation of marine-inspired compounds result in hybrids with antitrypanosomal and antileishmanial activities**

Diogo Teixeira Carvalho<sup>1,2\*</sup>, Melissa Teixeira<sup>1,3</sup>, Sara Luelmo<sup>4</sup>, Nuno Santarém<sup>3,4</sup>, Eugénia Pinto<sup>4</sup>, Anabela Cordeiro-da-Silva<sup>3,4</sup>, Emília Sousa<sup>1,5\*</sup>

<sup>1</sup>Laboratory of Organic and Pharmaceutical Chemistry, Department of Chemical Sciences, Faculty of Pharmacy, University of Porto, Rua Jorge Viterbo Ferreira 228, 4050-313 Porto, Portugal.

<sup>2</sup>Laboratory of Research in Pharmaceutical Chemistry, Department of Food and Drugs, Faculty of Pharmaceutical Sciences, Federal University of Alfenas, Rua Gabriel Monteiro da Silva, 700, 37130-001 Alfenas, Brazil.

<sup>3</sup>Laboratory of Microbiology, Department of Biological Sciences, Faculty of Pharmacy, University of Porto, Rua de Jorge Viterbo Ferreira 228, 4050-313 Porto, Portugal.

<sup>4</sup>Institute for Research and Innovation in Health (i3S), University of Porto, 4200-135 Porto, Portugal.

<sup>5</sup>Interdisciplinary Centre of Marine and Environmental Research (CIIMAR), Terminal de Cruzeiros do Porto de Leixões, Av. General Norton de Matos s/n, 4450-208 Matosinhos, Portugal.

\* Correspondence: diogo.carvalho@unifal-mg.edu.br (D.C.); esousa@ff.up.pt (E.S.)

## TABLE OF CONTENTES

|                    |                                                                                               |    |
|--------------------|-----------------------------------------------------------------------------------------------|----|
| <b>Figure S1.</b>  | <sup>1</sup> H NMR Spectrum for Compound <b>4</b> in CDCl <sub>3</sub> (300 MHz)              | 3  |
| <b>Figure S2.</b>  | <sup>13</sup> C NMR Spectrum for Compound <b>4</b> in CDCl <sub>3</sub> (75 MHz)              | 3  |
| <b>Figure S3.</b>  | <sup>1</sup> H NMR Spectrum for Compound <b>6a</b> in DMSO- <i>d</i> <sub>6</sub> (400 MHz)   | 4  |
| <b>Figure S4.</b>  | <sup>13</sup> C NMR Spectrum for Compound <b>6a</b> in DMSO- <i>d</i> <sub>6</sub> (100 MHz)  | 4  |
| <b>Figure S5.</b>  | <sup>1</sup> H NMR Spectrum for Compound <b>7a</b> in DMSO- <i>d</i> <sub>6</sub> (400 MHz)   | 5  |
| <b>Figure S6.</b>  | <sup>13</sup> C NMR Spectrum for Compound <b>7a</b> in DMSO- <i>d</i> <sub>6</sub> (100 MHz)  | 5  |
| <b>Figure S7.</b>  | <sup>1</sup> H NMR Spectrum for Compound <b>9a</b> in DMSO- <i>d</i> <sub>6</sub> (400 MHz)   | 6  |
| <b>Figure S8.</b>  | <sup>13</sup> C NMR Spectrum for Compound <b>9a</b> in DMSO- <i>d</i> <sub>6</sub> (100 MHz)  | 6  |
| <b>Figure S9.</b>  | DEPT-135 Subspectrum for Compound <b>9a</b> in DMSO- <i>d</i> <sub>6</sub> (100 MHz)          | 7  |
| <b>Figure S10.</b> | ESI-HRMS Spectrum for Compound <b>9a</b>                                                      | 7  |
| <b>Figure S11.</b> | <sup>1</sup> H NMR Spectrum for Compound <b>9b</b> in DMSO- <i>d</i> <sub>6</sub> (400 MHz)   | 8  |
| <b>Figure S12.</b> | <sup>13</sup> C NMR Spectrum for Compound <b>9b</b> in DMSO- <i>d</i> <sub>6</sub> (100 MHz)  | 8  |
| <b>Figure S13.</b> | DEPT-135 Subspectrum for Compound <b>9b</b> in DMSO- <i>d</i> <sub>6</sub> (100 MHz)          | 9  |
| <b>Figure S14.</b> | ESI-HRMS Spectrum for Compound <b>9b</b>                                                      | 9  |
| <b>Figure S15.</b> | <sup>1</sup> H NMR Spectrum for Compound <b>9c</b> in DMSO- <i>d</i> <sub>6</sub> (400 MHz)   | 10 |
| <b>Figure S16.</b> | <sup>13</sup> C NMR Spectrum for Compound <b>9c</b> in DMSO- <i>d</i> <sub>6</sub> (100 MHz)  | 10 |
| <b>Figure S17.</b> | DEPT-135 Subspectrum for Compound <b>9c</b> in DMSO- <i>d</i> <sub>6</sub> (100 MHz)          | 11 |
| <b>Figure S18.</b> | ESI-HRMS Spectrum for Compound <b>9c</b>                                                      | 11 |
| <b>Figure S19.</b> | <sup>1</sup> H NMR Spectrum for Compound <b>9d</b> in DMSO- <i>d</i> <sub>6</sub> (400 MHz)   | 12 |
| <b>Figure S20.</b> | <sup>13</sup> C NMR Spectrum for Compound <b>9d</b> in DMSO- <i>d</i> <sub>6</sub> (100 MHz)  | 12 |
| <b>Figure S21.</b> | DEPT-135 Subspectrum for Compound <b>9d</b> in DMSO- <i>d</i> <sub>6</sub> (100 MHz)          | 13 |
| <b>Figure S22.</b> | ESI-HRMS Spectrum for Compound <b>9d</b>                                                      | 13 |
| <b>Figure S23.</b> | <sup>1</sup> H NMR Spectrum for Compound <b>10a</b> in DMSO- <i>d</i> <sub>6</sub> (400 MHz)  | 14 |
| <b>Figure S24.</b> | <sup>13</sup> C NMR Spectrum for Compound <b>10a</b> in DMSO- <i>d</i> <sub>6</sub> (100 MHz) | 14 |
| <b>Figure S25.</b> | DEPT-135 Subspectrum for Compound <b>10a</b> in DMSO- <i>d</i> <sub>6</sub> (100 MHz)         | 15 |
| <b>Figure S26.</b> | ESI-HRMS Spectrum for Compound <b>10a</b>                                                     | 15 |
| <b>Figure S27.</b> | <sup>1</sup> H NMR Spectrum for Compound <b>10b</b> in DMSO- <i>d</i> <sub>6</sub> (400 MHz)  | 16 |
| <b>Figure S28.</b> | <sup>13</sup> C NMR Spectrum for Compound <b>10b</b> in DMSO- <i>d</i> <sub>6</sub> (100 MHz) | 16 |
| <b>Figure S29.</b> | DEPT-135 Subspectrum for Compound <b>10b</b> in DMSO- <i>d</i> <sub>6</sub> (100 MHz)         | 17 |
| <b>Figure S30.</b> | ESI-HRMS Spectrum for Compound <b>10b</b>                                                     | 17 |
| <b>Figure S31.</b> | <sup>1</sup> H NMR Spectrum for Compound <b>10c</b> in DMSO- <i>d</i> <sub>6</sub> (400 MHz)  | 18 |
| <b>Figure S32.</b> | <sup>13</sup> C NMR Spectrum for Compound <b>10c</b> in DMSO- <i>d</i> <sub>6</sub> (100 MHz) | 18 |
| <b>Figure S33.</b> | DEPT-135 Subspectrum for Compound <b>10c</b> in DMSO- <i>d</i> <sub>6</sub> (100 MHz)         | 19 |
| <b>Figure S34.</b> | ESI-HRMS Spectrum for Compound <b>10c</b>                                                     | 19 |
| <b>Figure S35.</b> | <sup>1</sup> H NMR Spectrum for Compound <b>13</b> in DMSO- <i>d</i> <sub>6</sub> (400 MHz)   | 20 |

|                    |                                                                                                                |    |
|--------------------|----------------------------------------------------------------------------------------------------------------|----|
| <b>Figure S36.</b> | $^{13}\text{C}$ NMR Spectrum for Compound <b>13</b> in DMSO- $d_6$ (100 MHz)                                   | 20 |
| <b>Figure S37.</b> | DEPT-135 Subspectrum for Compound <b>13</b> in DMSO- $d_6$ (100 MHz)                                           | 21 |
| <b>Figure S38.</b> | ESI-HRMS Spectrum for Compound <b>13</b>                                                                       | 21 |
| <b>Figure S39.</b> | $^1\text{H}$ NMR Spectrum for Compound <b>14</b> in DMSO- $d_6$ (400 MHz)                                      | 22 |
| <b>Figure S40.</b> | $^{13}\text{C}$ NMR Spectrum for Compound <b>14</b> in DMSO- $d_6$ (100 MHz)                                   | 22 |
| <b>Figure S41.</b> | DEPT-135 Subspectrum for Compound <b>14</b> in DMSO- $d_6$ (100 MHz)                                           | 23 |
| <b>Figure S42.</b> | ESI-HRMS Spectrum for Compound <b>14</b>                                                                       | 23 |
| <b>Table S1.</b>   | Antimicrobial activity of compounds <b>9a-9d</b> , <b>10a-10c</b> , <b>13</b> , <b>14</b> , and <b>eugenol</b> | 24 |

**Figure S1.**  $^1\text{H}$  NMR Spectrum for Compound **4** in  $\text{CDCl}_3$  (300 MHz)

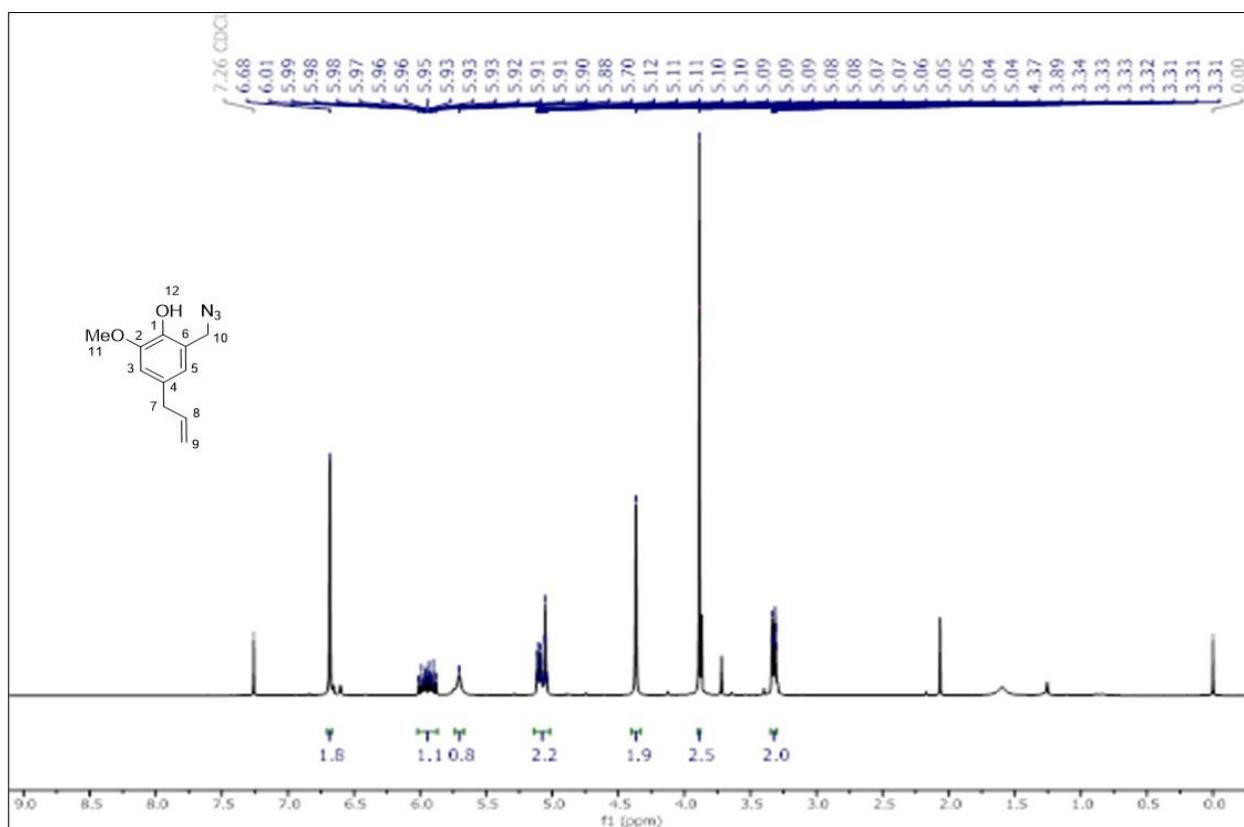

**Figure S2.**  $^{13}\text{C}$  NMR Spectrum for Compound **4** in  $\text{CDCl}_3$  (75 MHz)

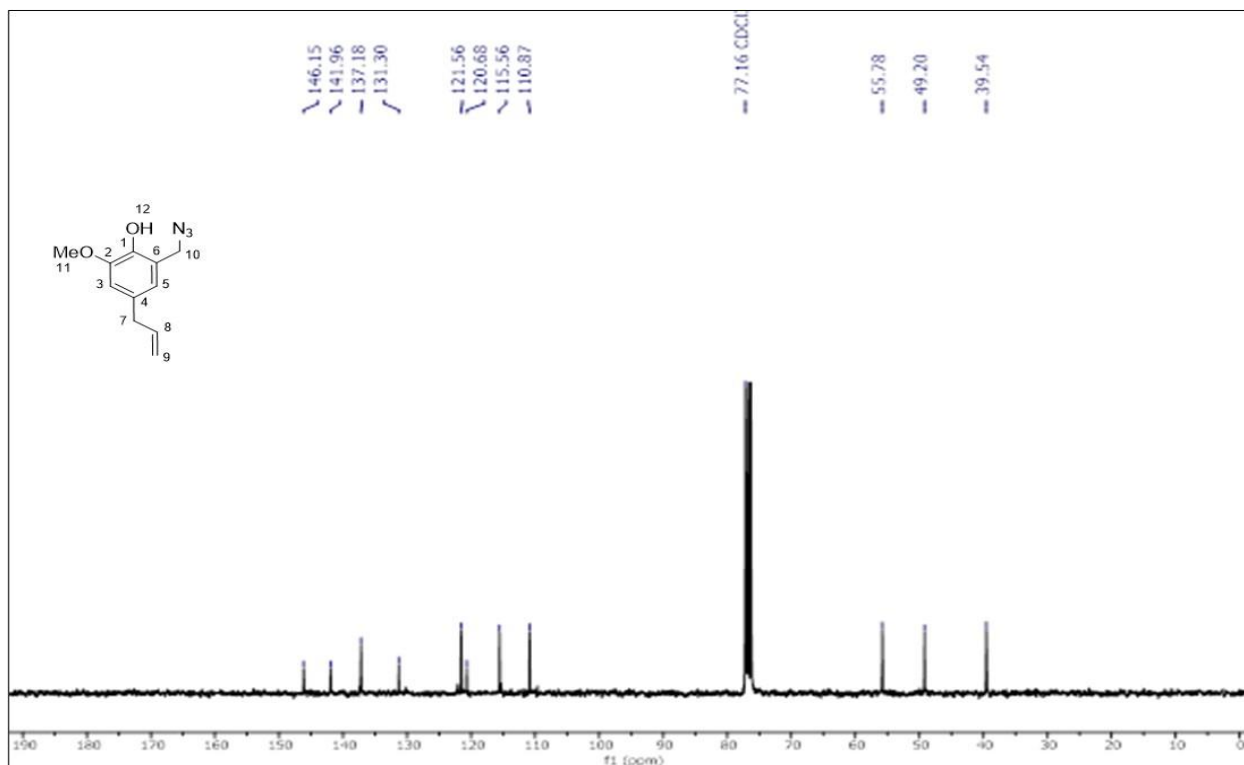

**Figure S3.**  $^1\text{H}$  NMR Spectrum for Compound **6a** in  $\text{DMSO}-d_6$  (400 MHz)

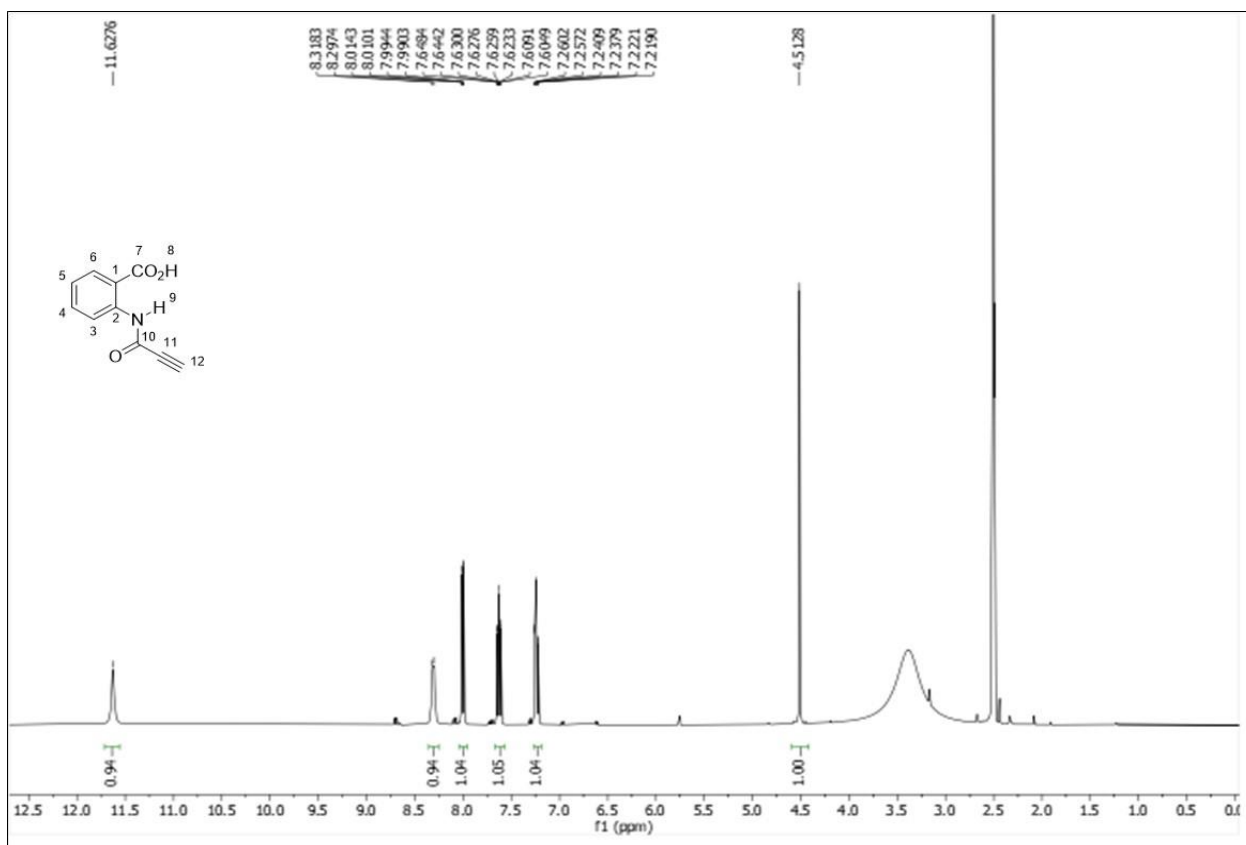

**Figure S4.**  $^{13}\text{C}$  NMR Spectrum for Compound **6a** in  $\text{DMSO}-d_6$  (100 MHz)

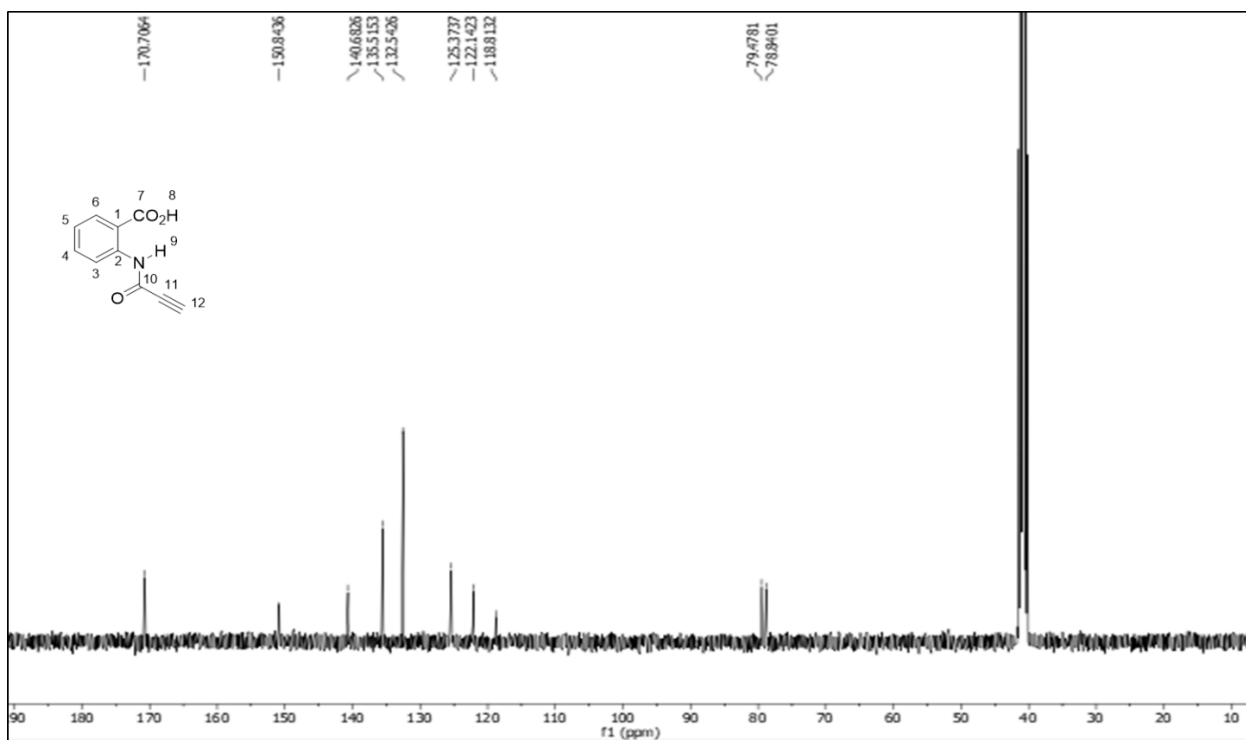

**Figure S5.**  $^1\text{H}$  NMR Spectrum for Compound **7a** in  $\text{DMSO}-d_6$  (400 MHz)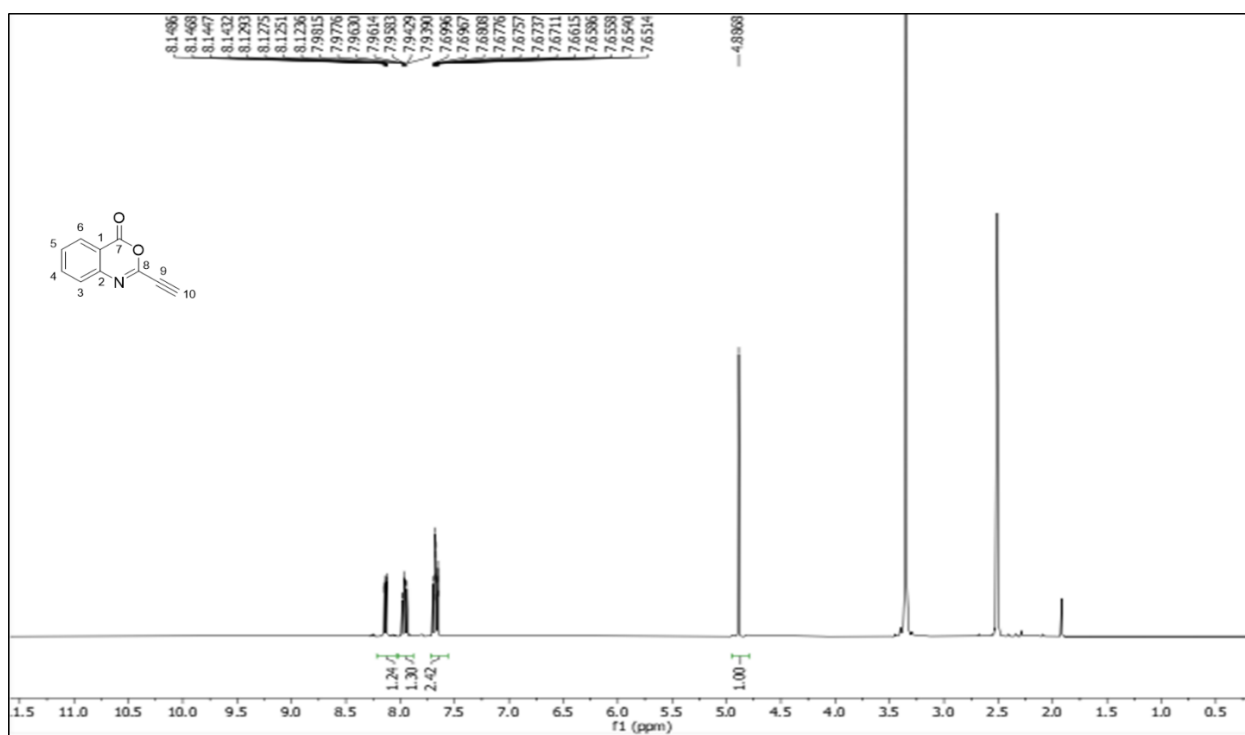**Figure S6.**  $^{13}\text{C}$  NMR Spectrum for Compound **7a** in  $\text{DMSO}-d_6$  (100 MHz)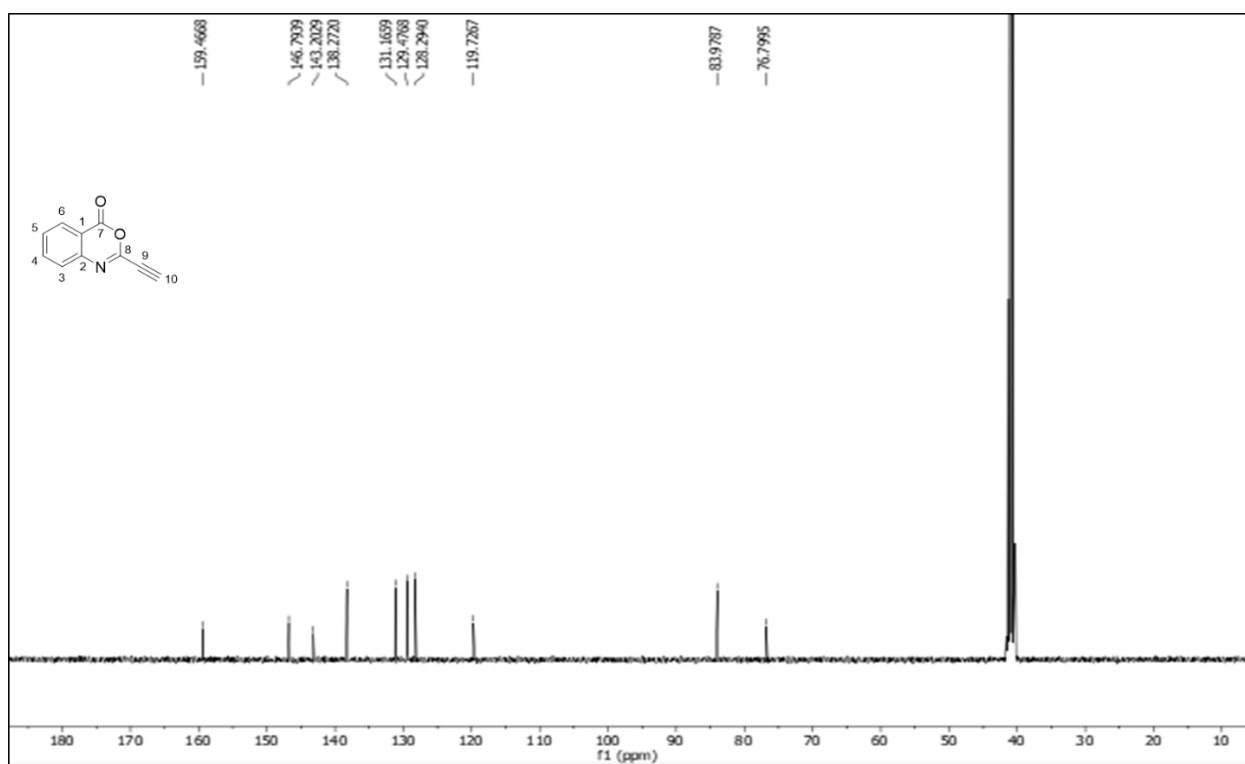

**Figure S7.**  $^1\text{H}$  NMR Spectrum for Compound **9a** in  $\text{DMSO}-d_6$  (400 MHz)

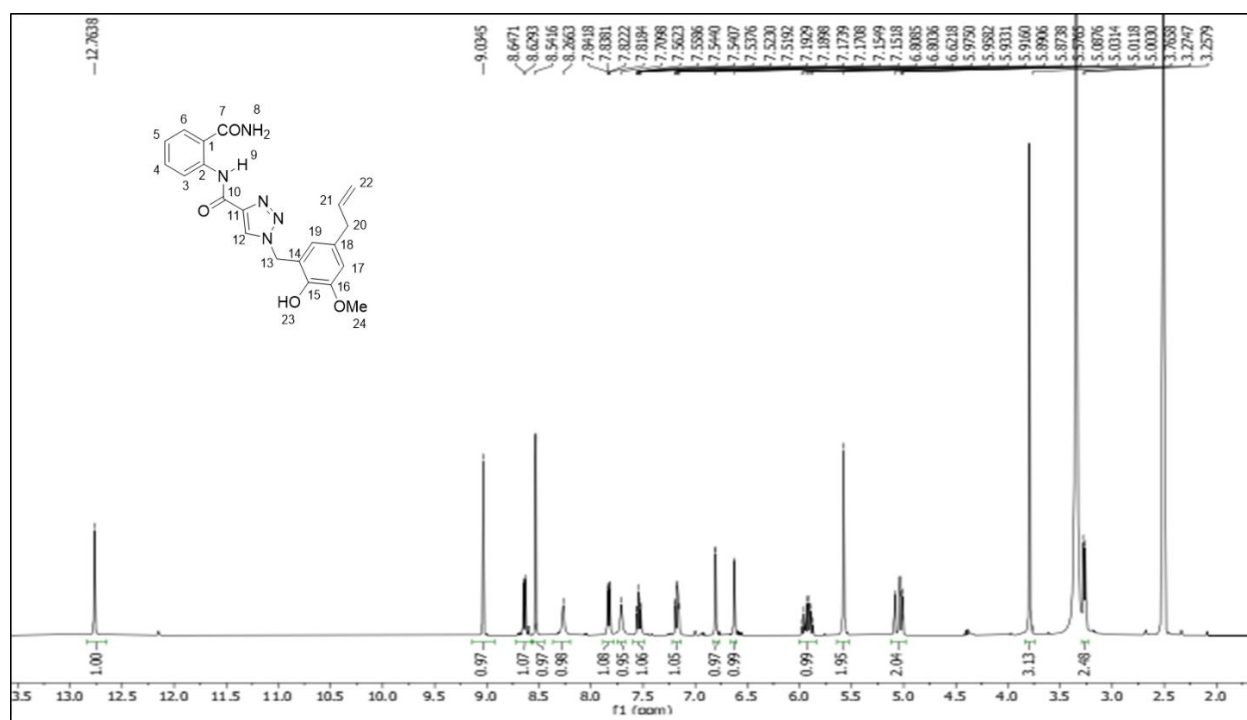

**Figure S8.**  $^{13}\text{C}$  NMR Spectrum for Compound **9a** in  $\text{DMSO}-d_6$  (100 MHz)

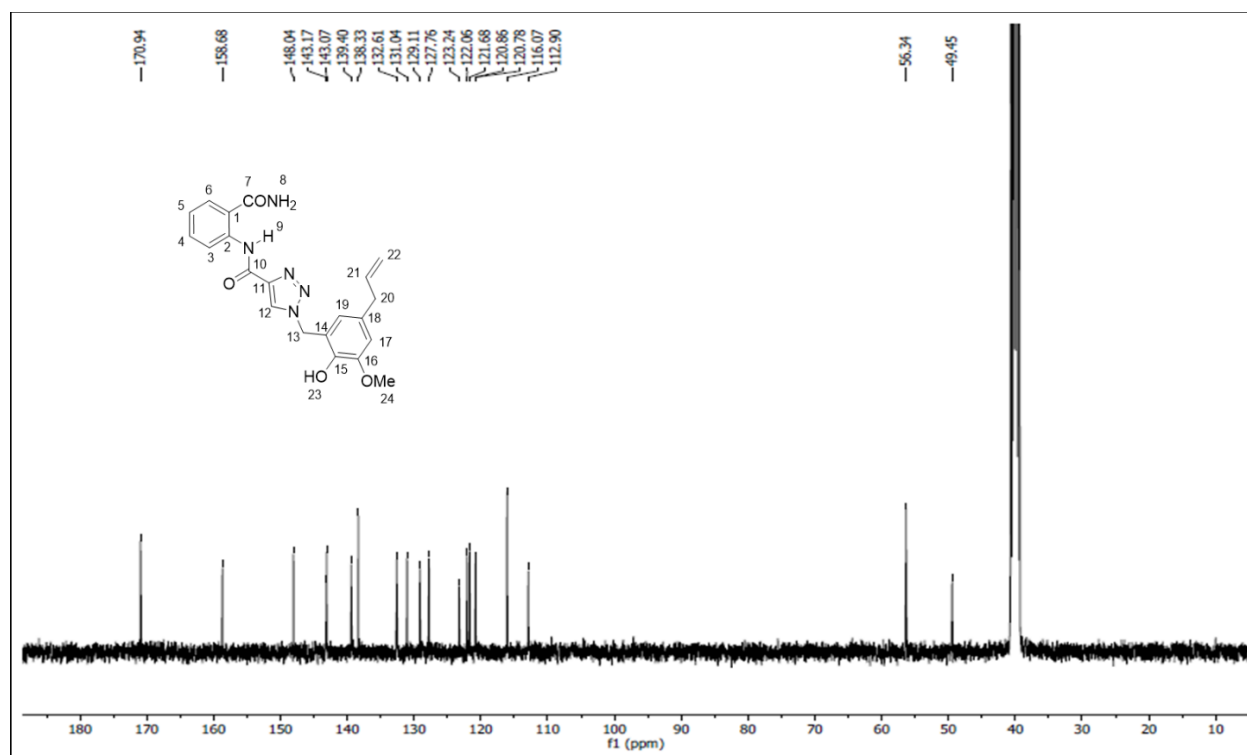

**Figure S9.** DEPT-135 Subspectrum for Compound **9a** in DMSO-*d*<sub>6</sub> (100 MHz)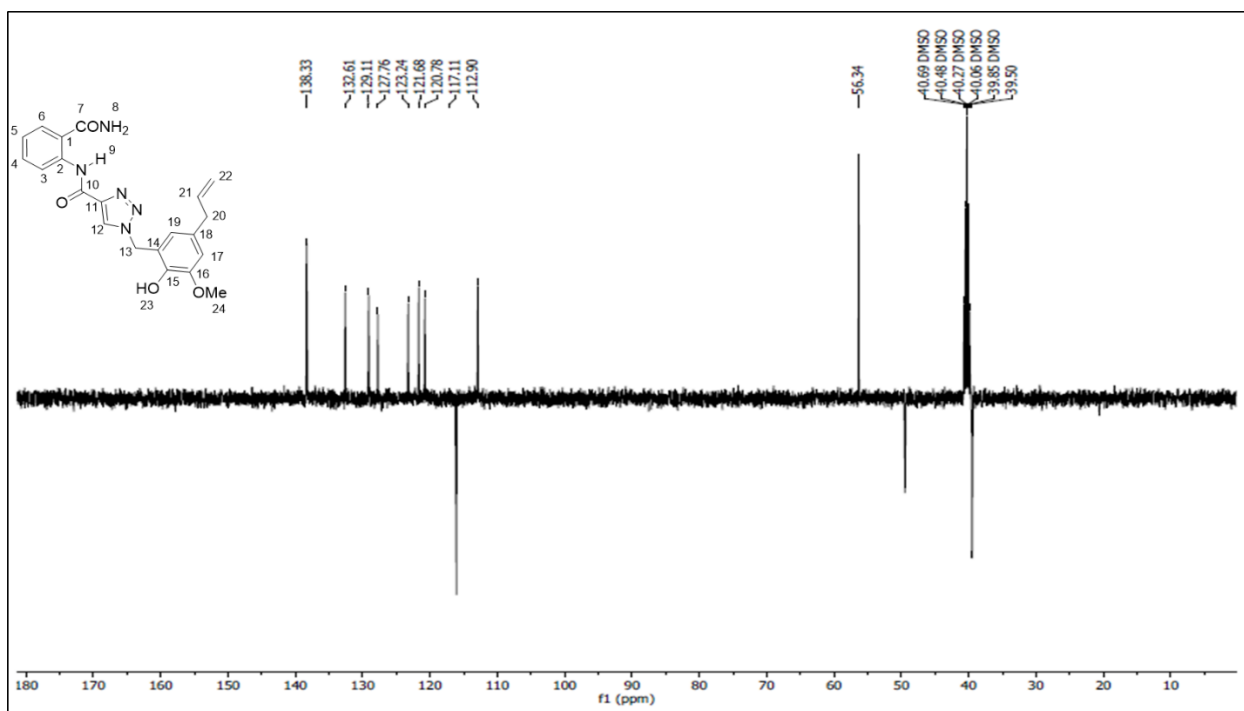**Figure S10.** ESI-HRMS Spectrum for Compound **9a**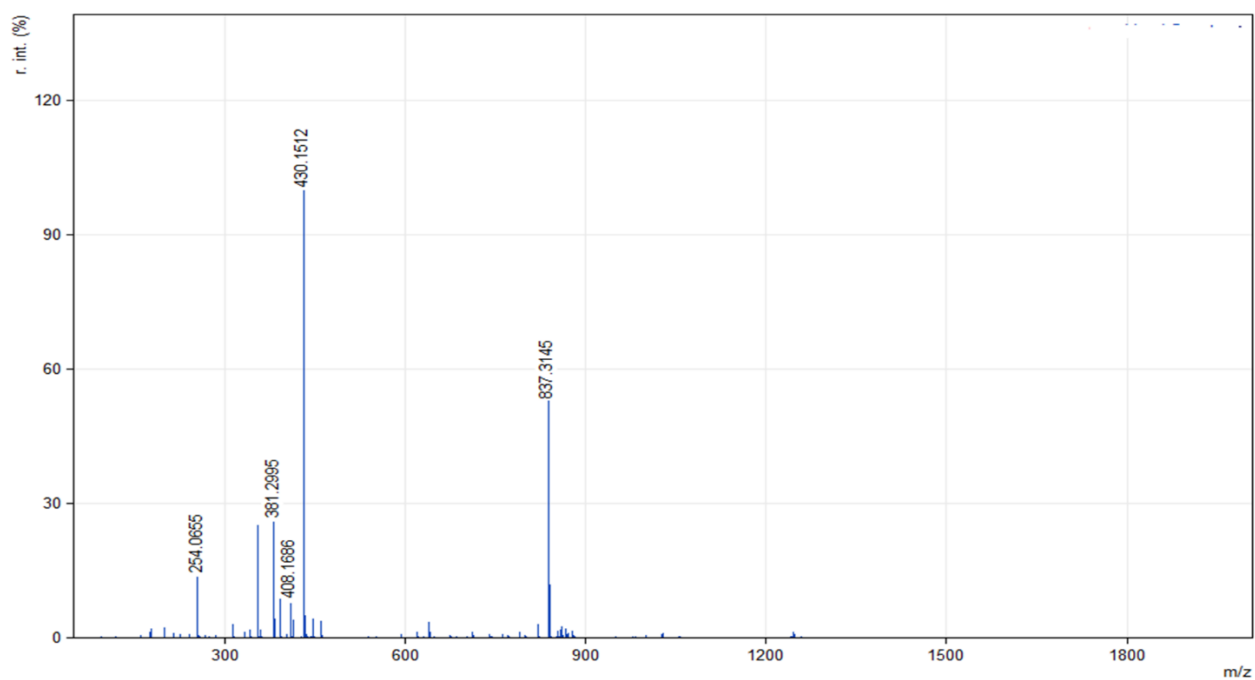



**Figure S11.**  $^1\text{H}$  NMR Spectrum for Compound **9b** in  $\text{DMSO}-d_6$  (400 MHz)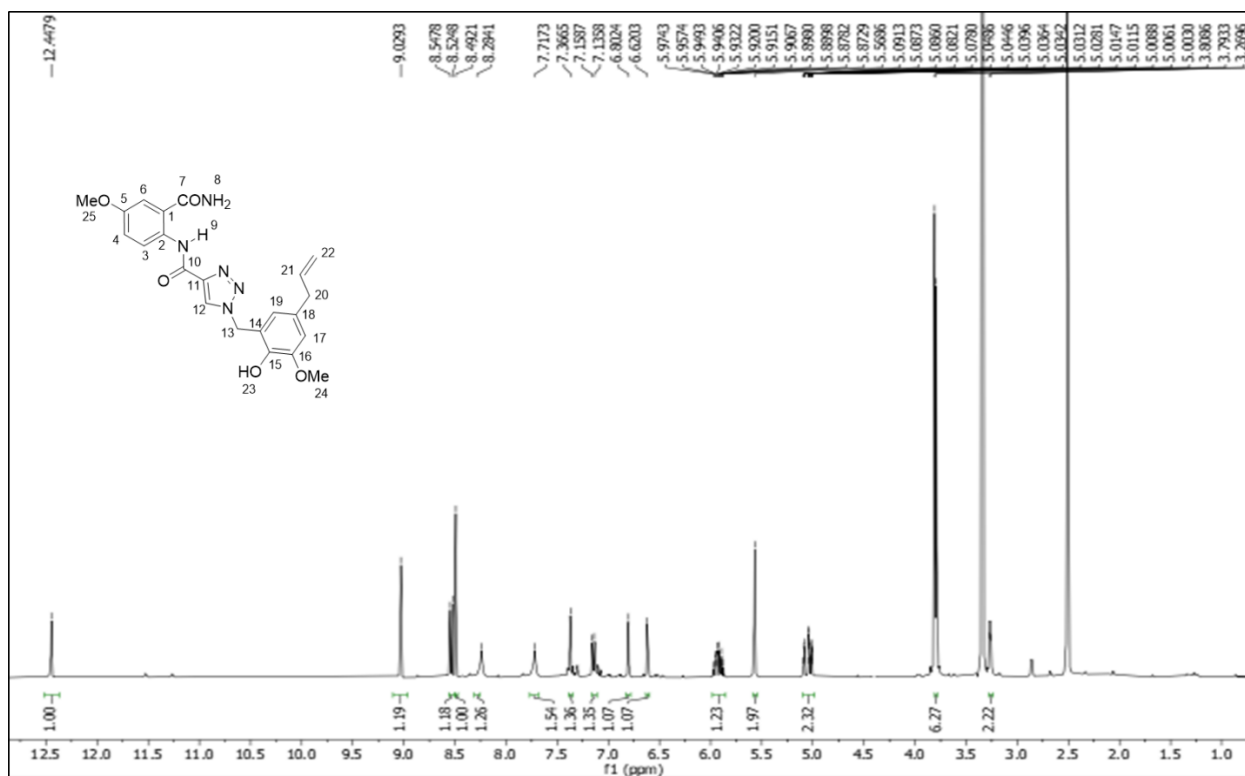**Figure S12.**  $^{13}\text{C}$  NMR Spectrum for Compound **9b** in  $\text{DMSO}-d_6$  (100 MHz)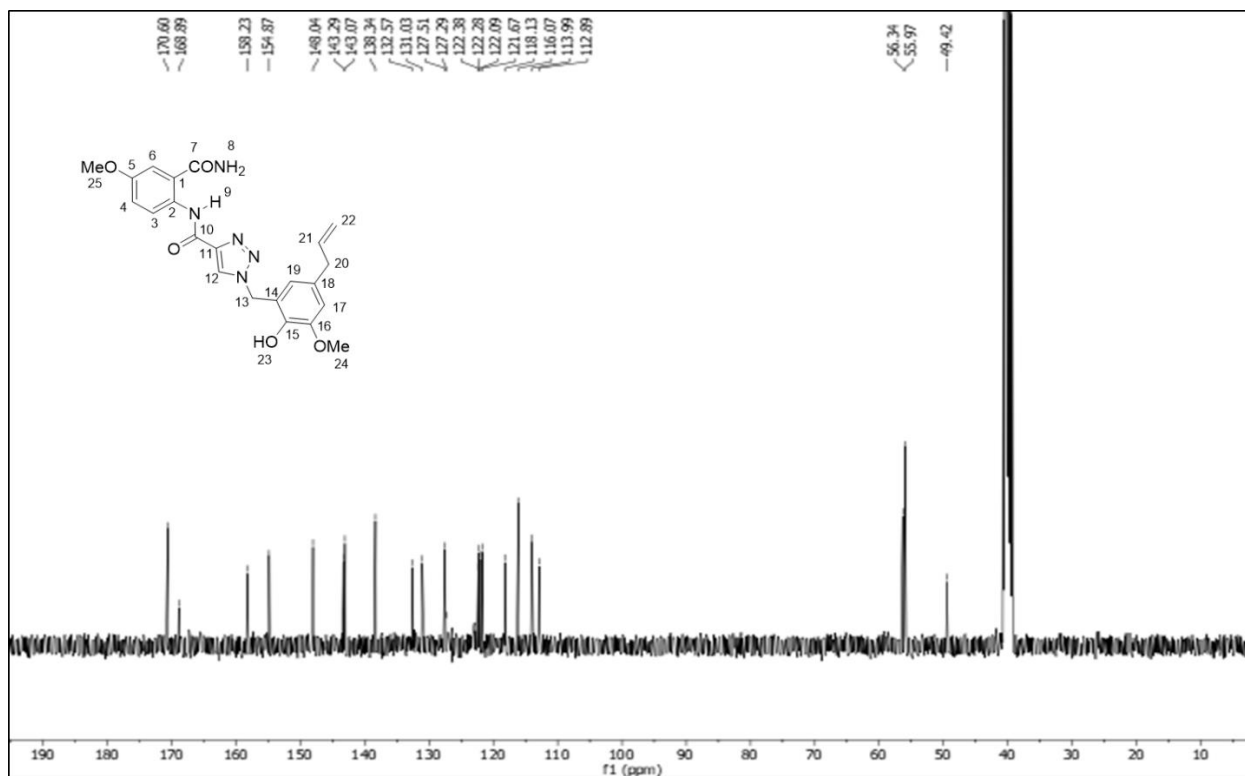

**Figure S13.** DEPT-135 Subspectrum for Compound **9b** in DMSO-*d*<sub>6</sub> (100 MHz)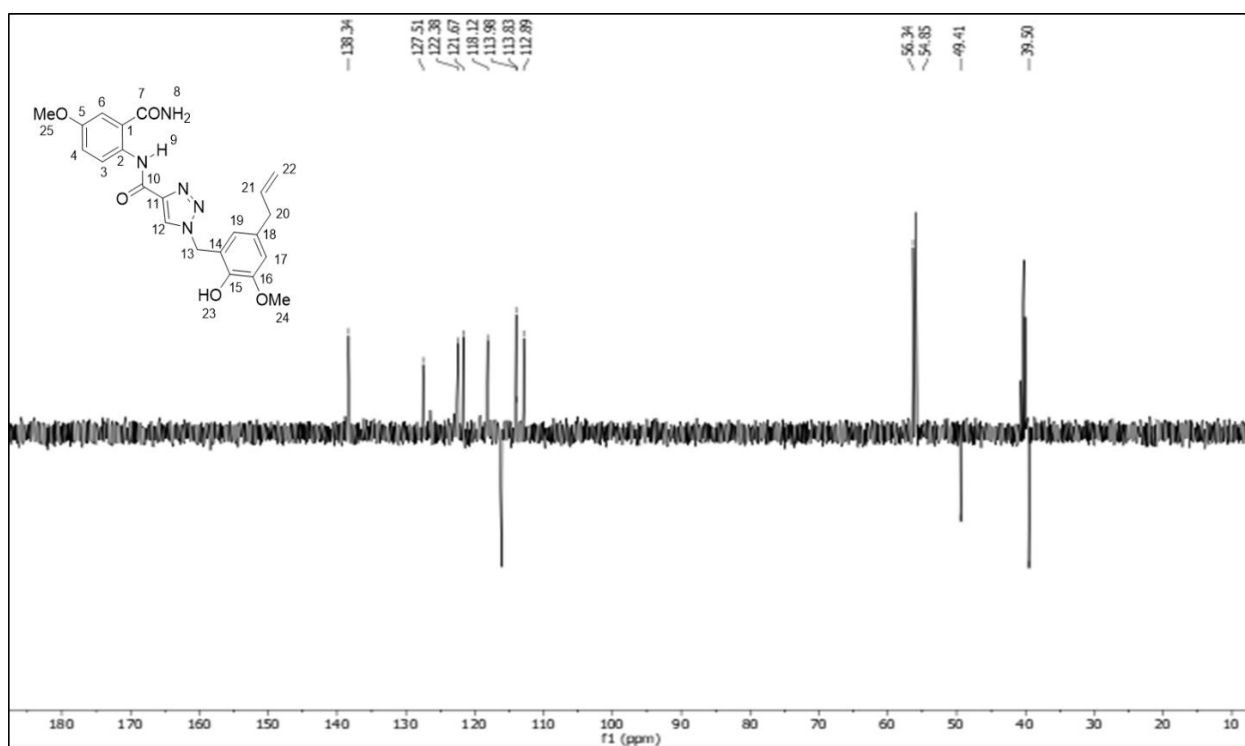**Figure S14.** ESI-HRMS Spectrum for Compound **9b**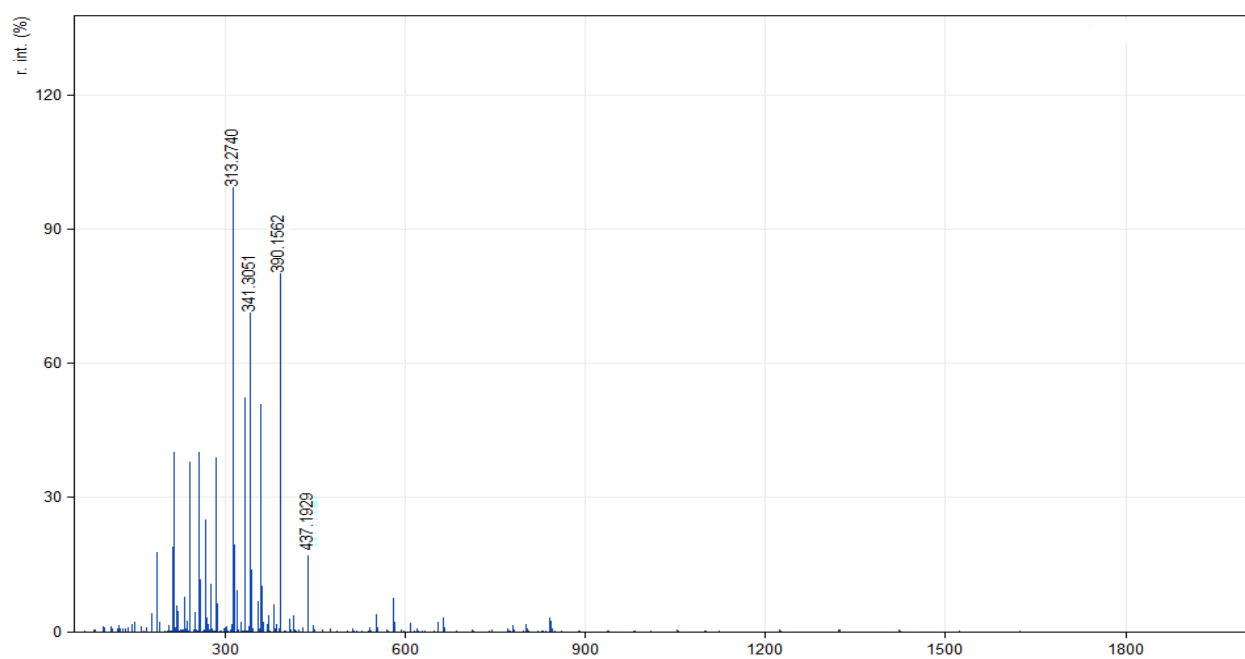

**Figure S15.**  $^1\text{H}$  NMR Spectrum for Compound **9c** in  $\text{DMSO}-d_6$  (400 MHz)

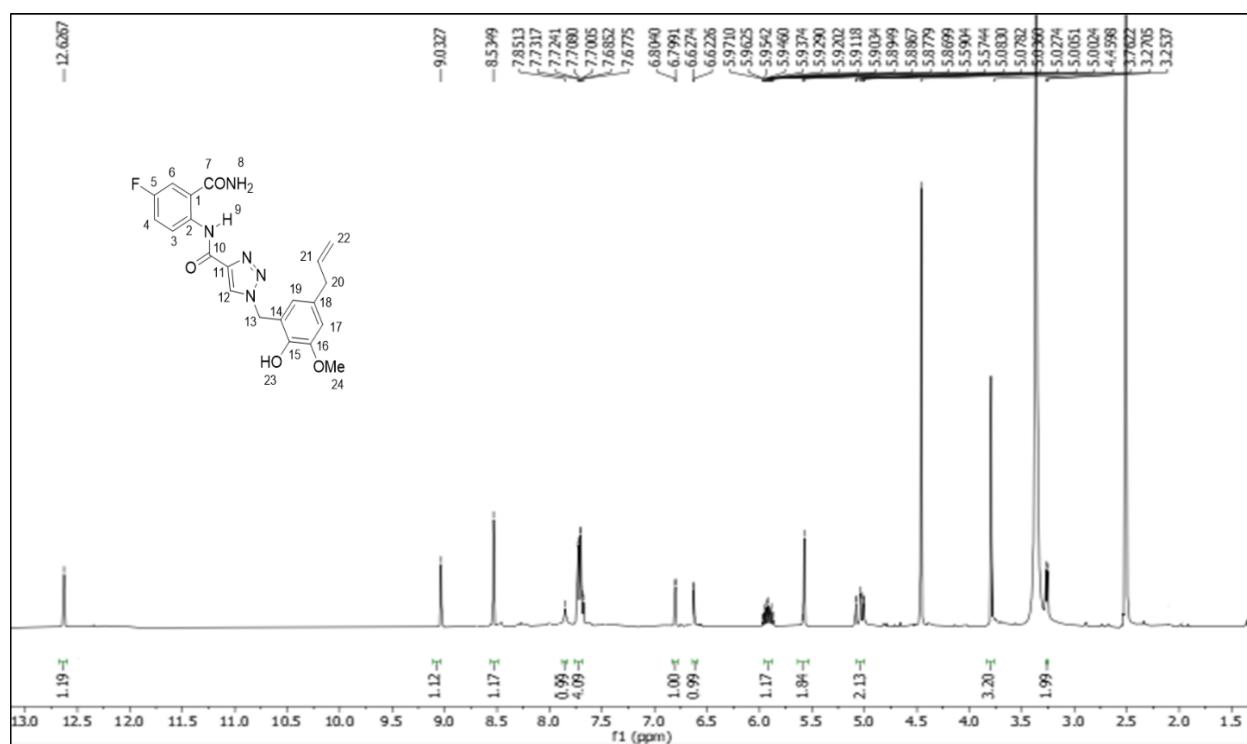

**Figure S16.**  $^{13}\text{C}$  NMR Spectrum for Compound **9c** in  $\text{DMSO}-d_6$  (100 MHz)

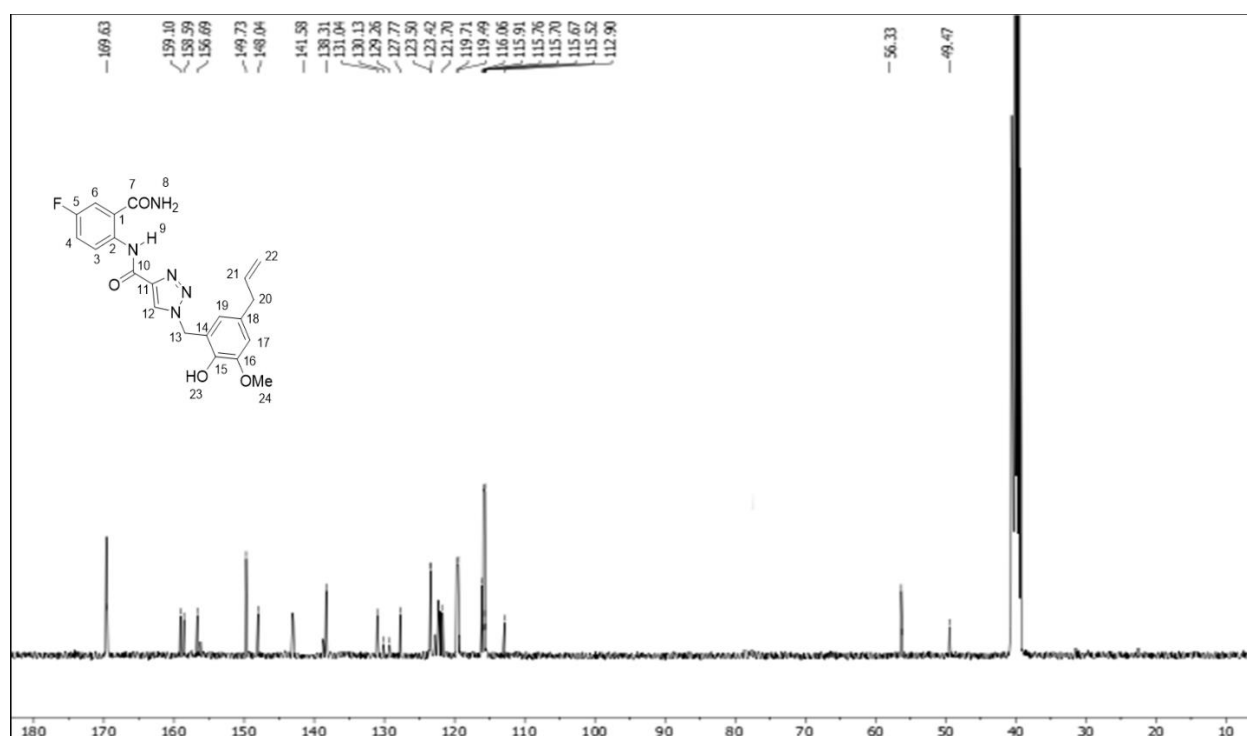

**Figure S17.** DEPT-135 Subspectrum for Compound **9c** in DMSO-*d*<sub>6</sub> (100 MHz)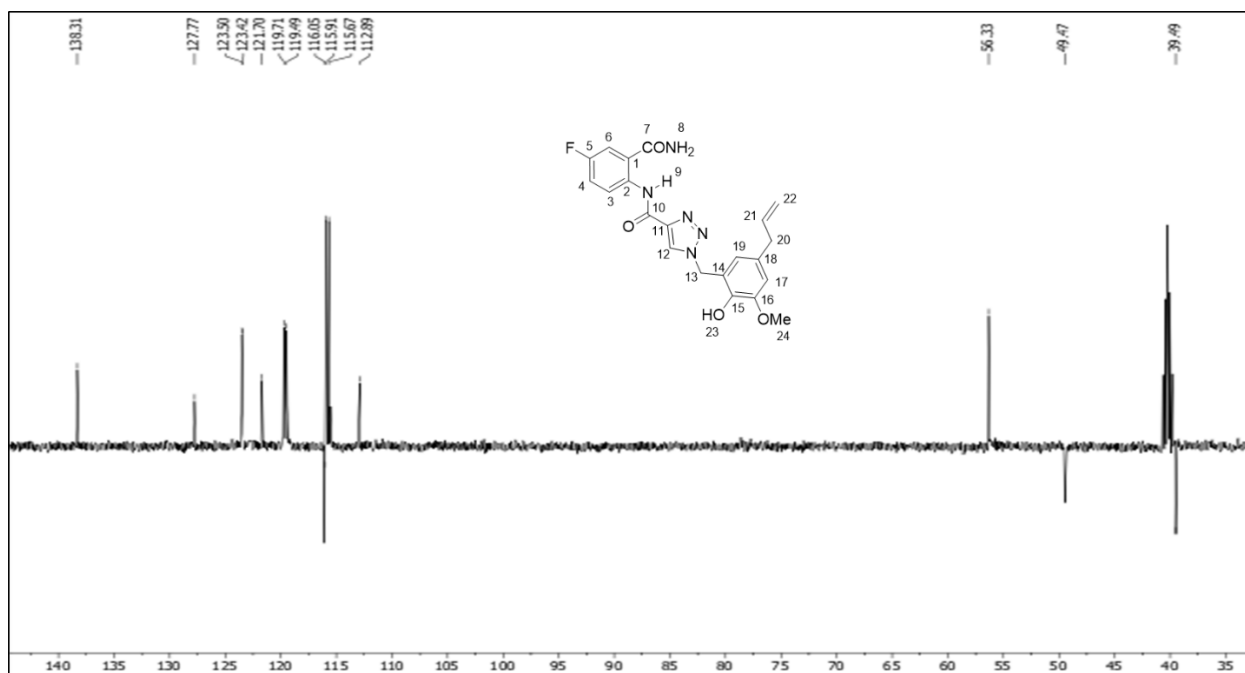**Figure S18.** ESI-HRMS Spectrum for Compound **9c**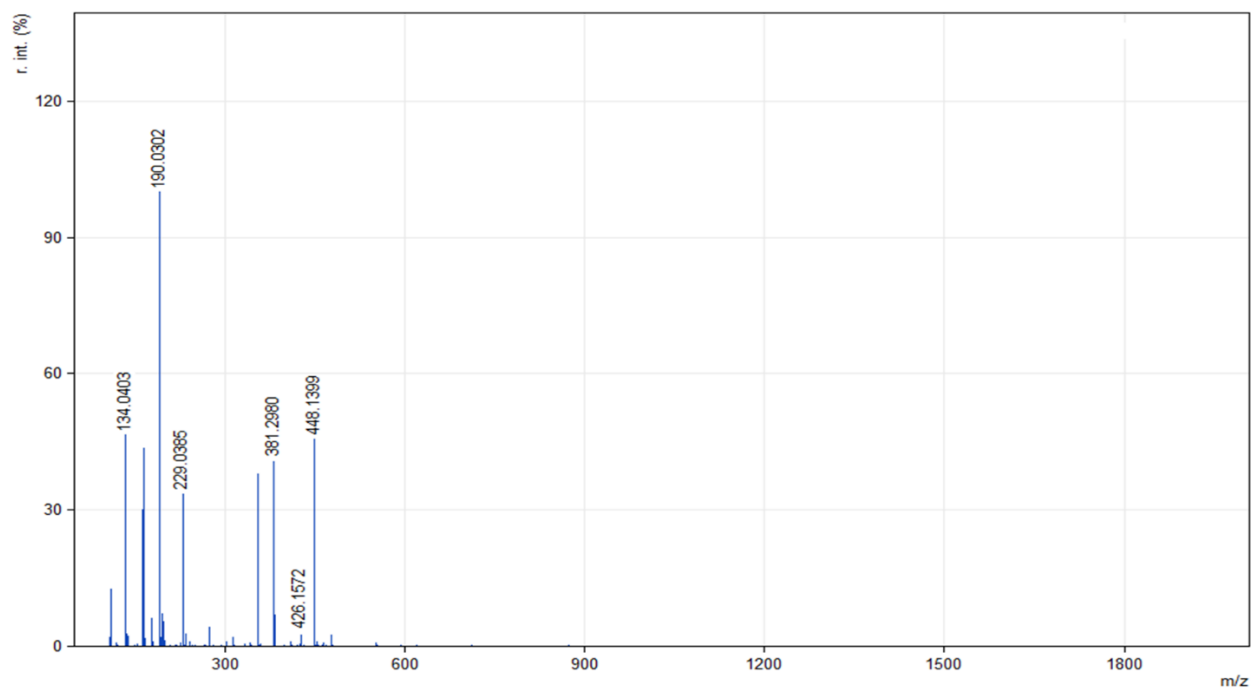

**Figure S19.**  $^1\text{H}$  NMR Spectrum for Compound **9d** in  $\text{DMSO}-d_6$  (400 MHz)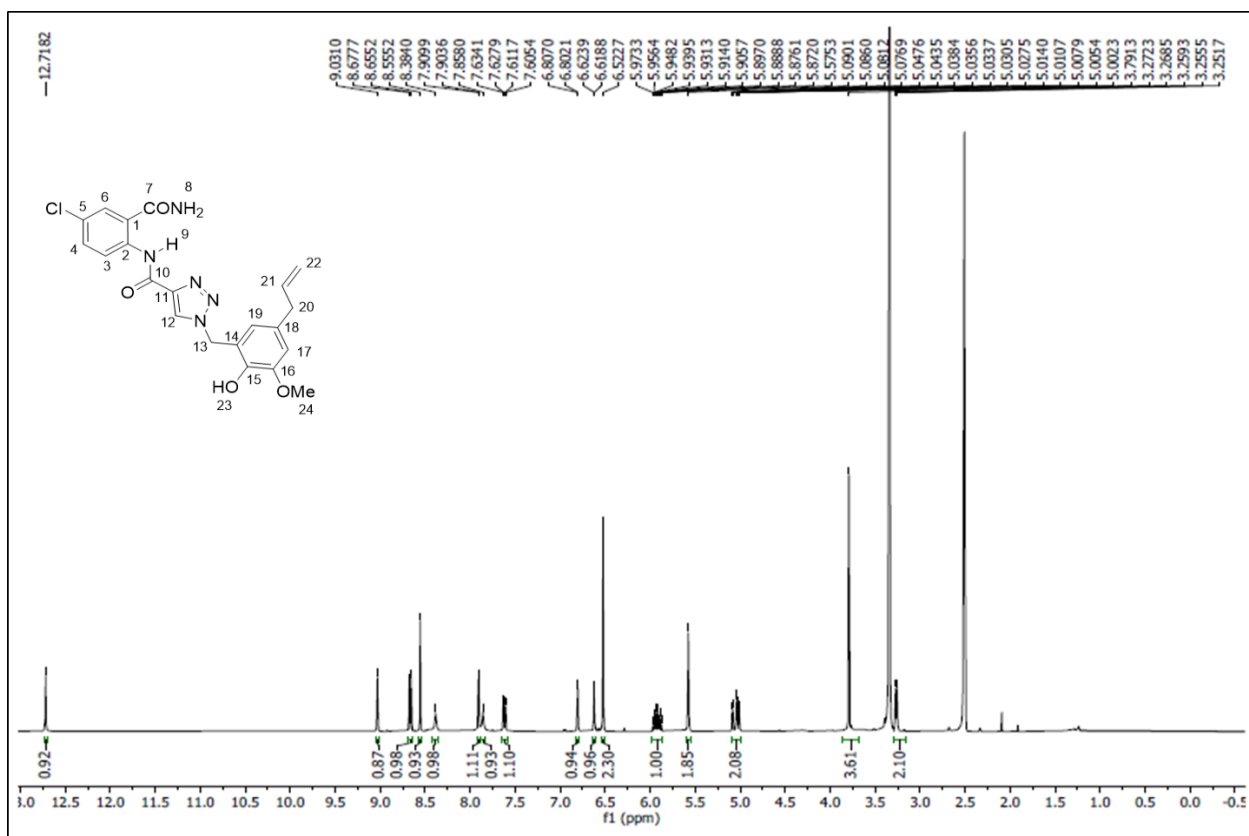**Figure S20.**  $^{13}\text{C}$  NMR Spectrum for Compound **9d** in  $\text{DMSO}-d_6$  (100 MHz)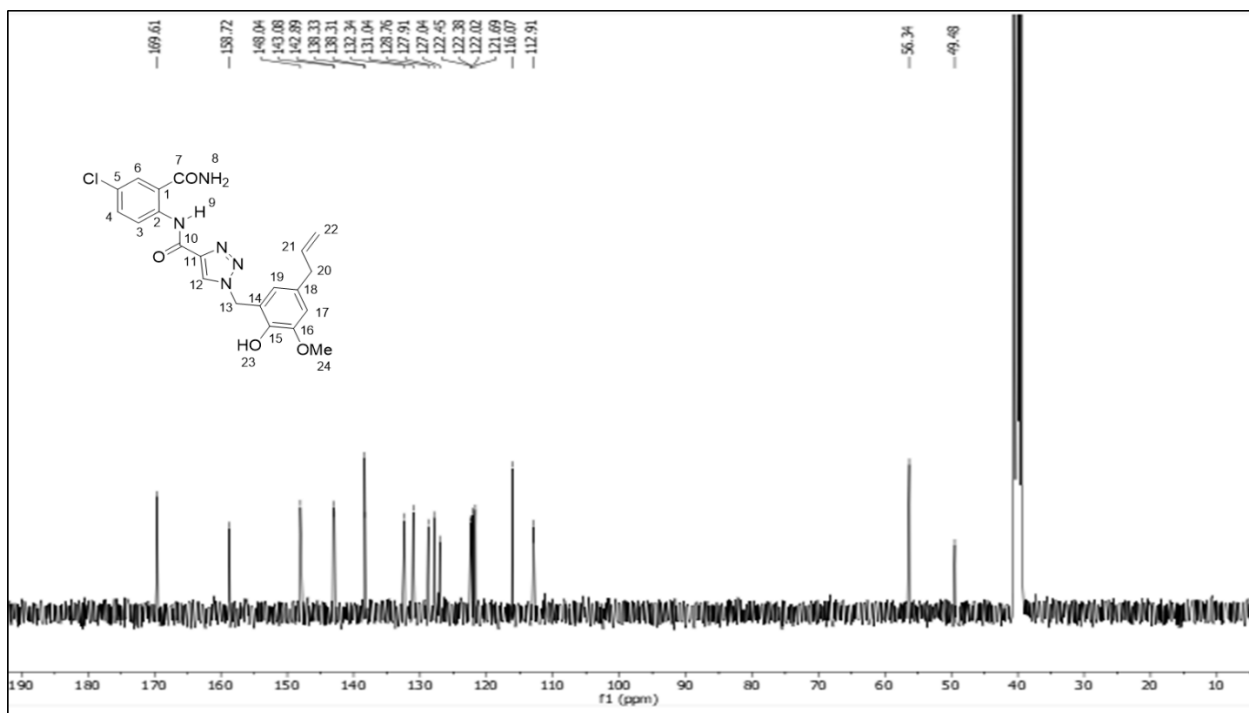

**Figure S21.** DEPT-135 Subspectrum for Compound **9d** in DMSO-*d*<sub>6</sub> (100 MHz)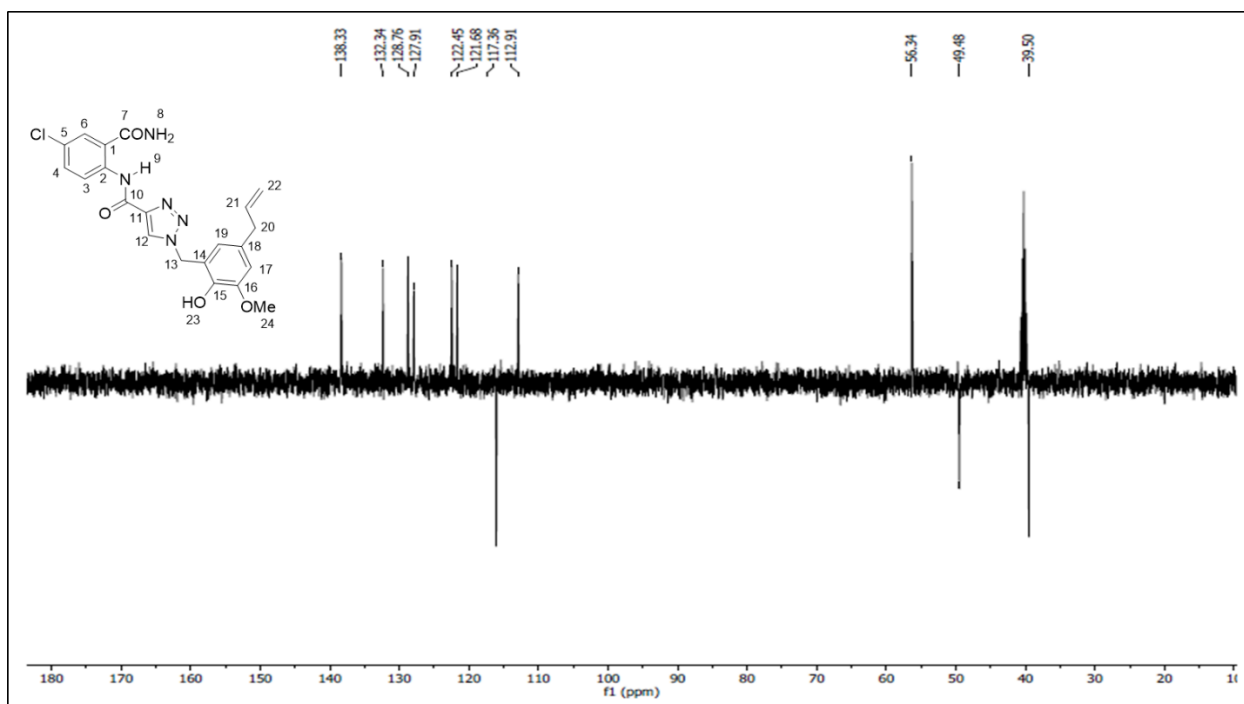**Figure S22.** ESI-HRMS Spectrum for Compound **9d**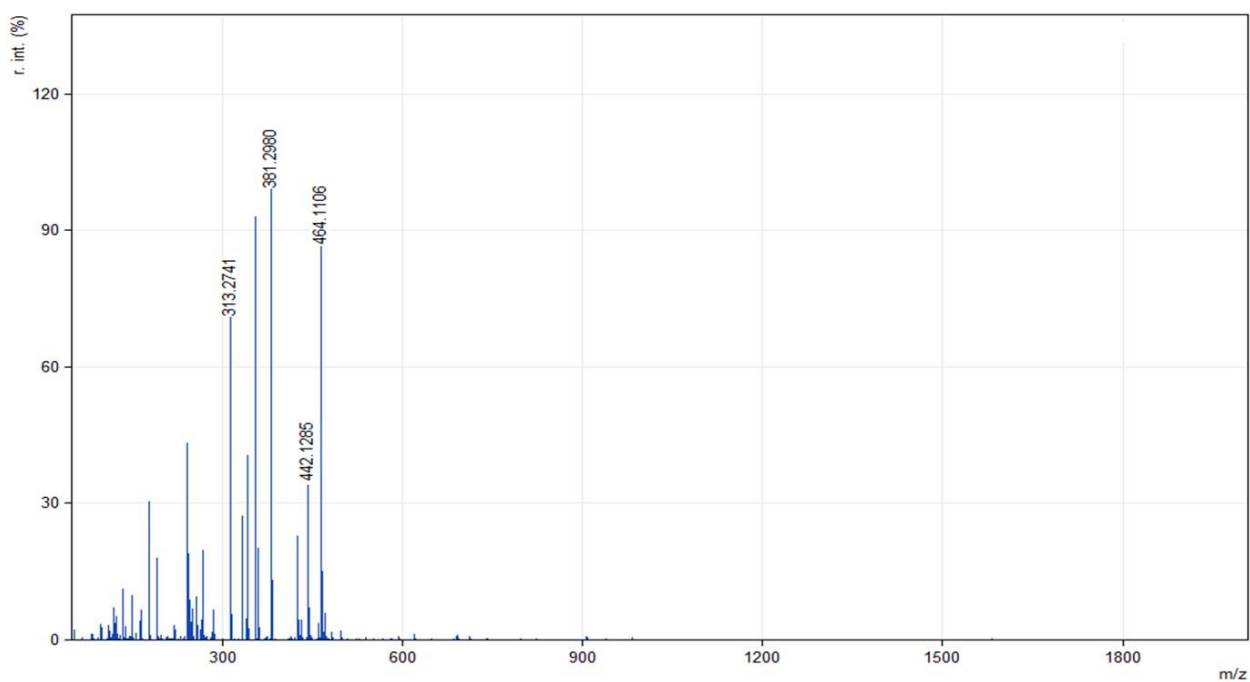

**Figure S23.**  $^1\text{H}$  NMR Spectrum for Compound **10a** in  $\text{DMSO}-d_6$  (400 MHz)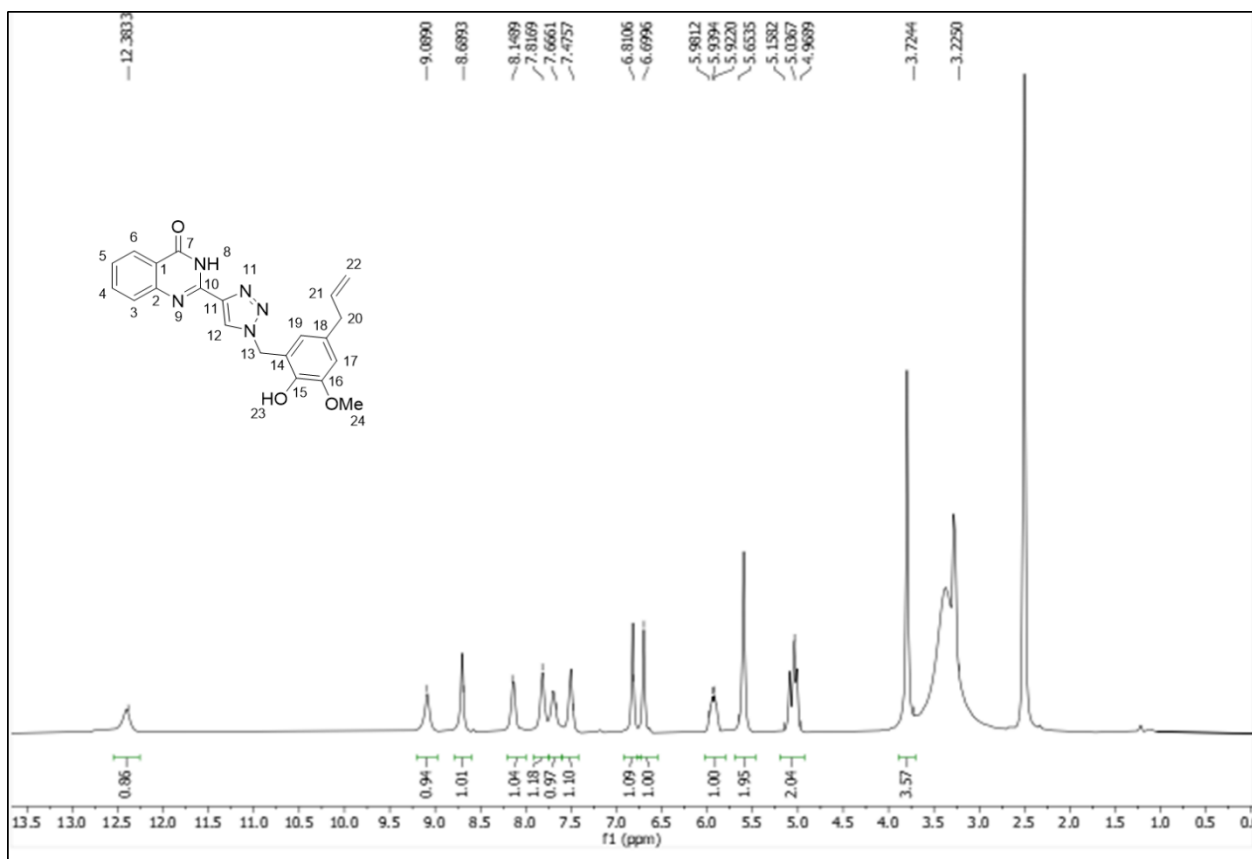**Figure S24.**  $^{13}\text{C}$  NMR Spectrum for Compound **10a** in  $\text{DMSO}-d_6$  (100 MHz)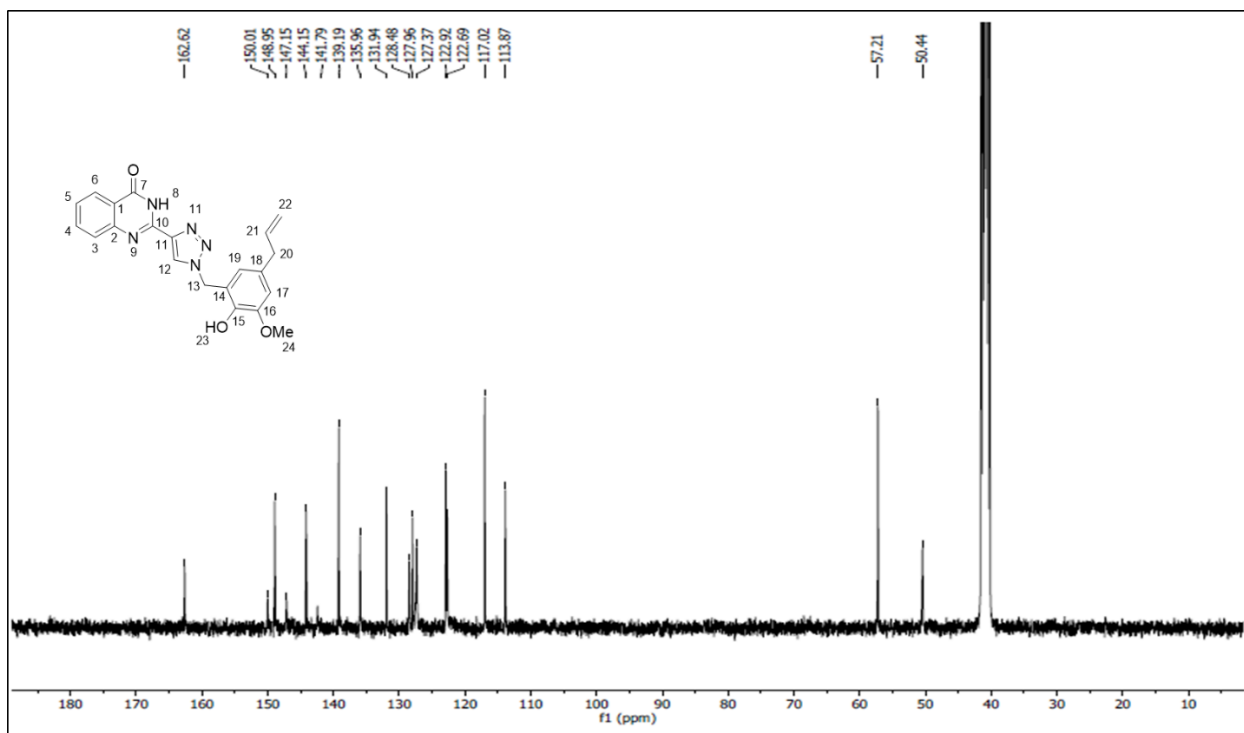

**Figure S25.** DEPT-135 Subspectrum for Compound **10a** in DMSO- $d_6$  (100 MHz)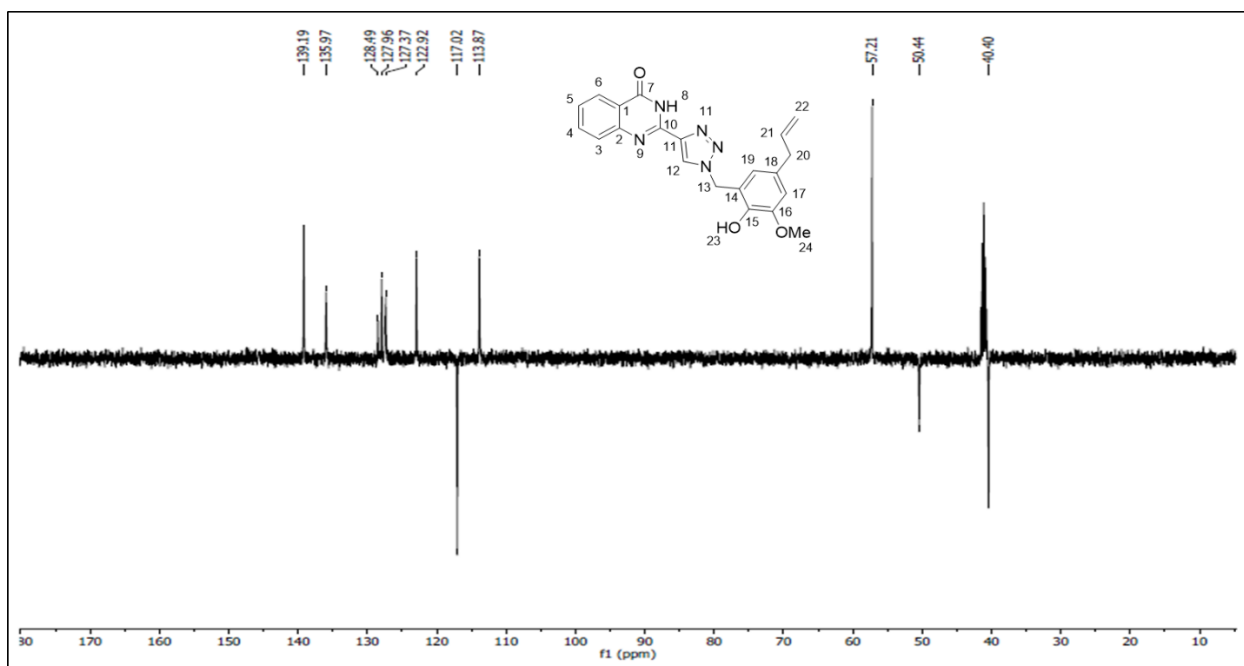**Figure S26.** ESI-HRMS Spectrum for Compound **10a**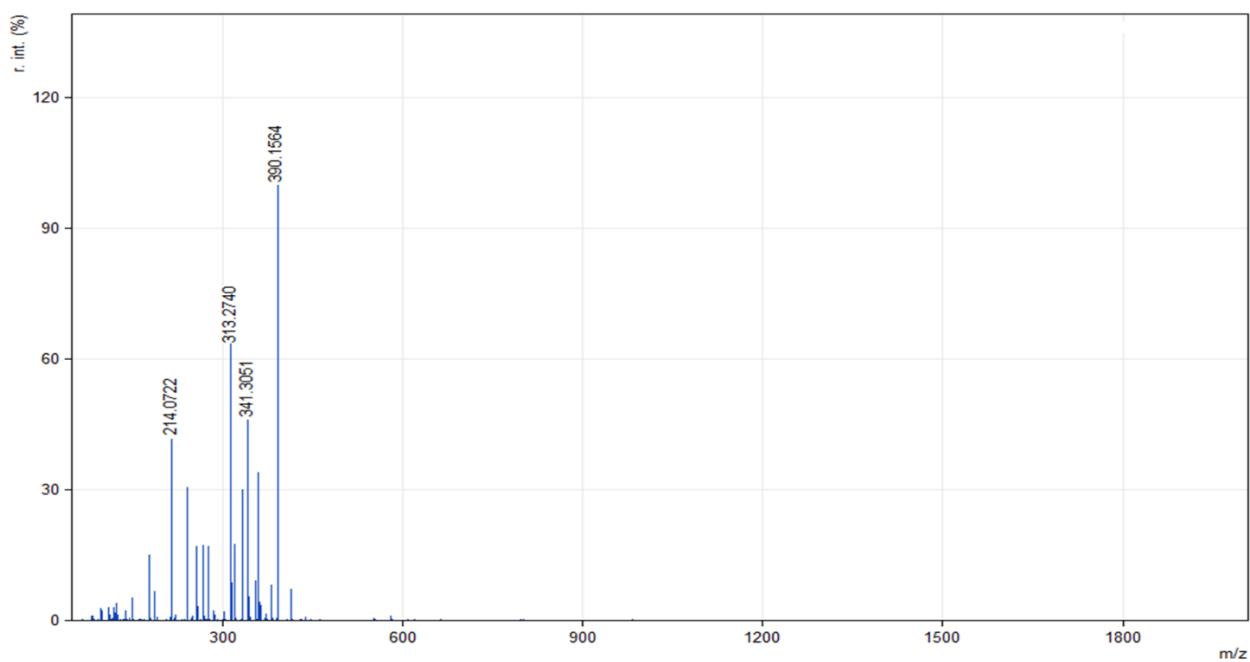



**Figure S27.**  $^1\text{H}$  NMR Spectrum for Compound **10b** in  $\text{DMSO}-d_6$  (400 MHz)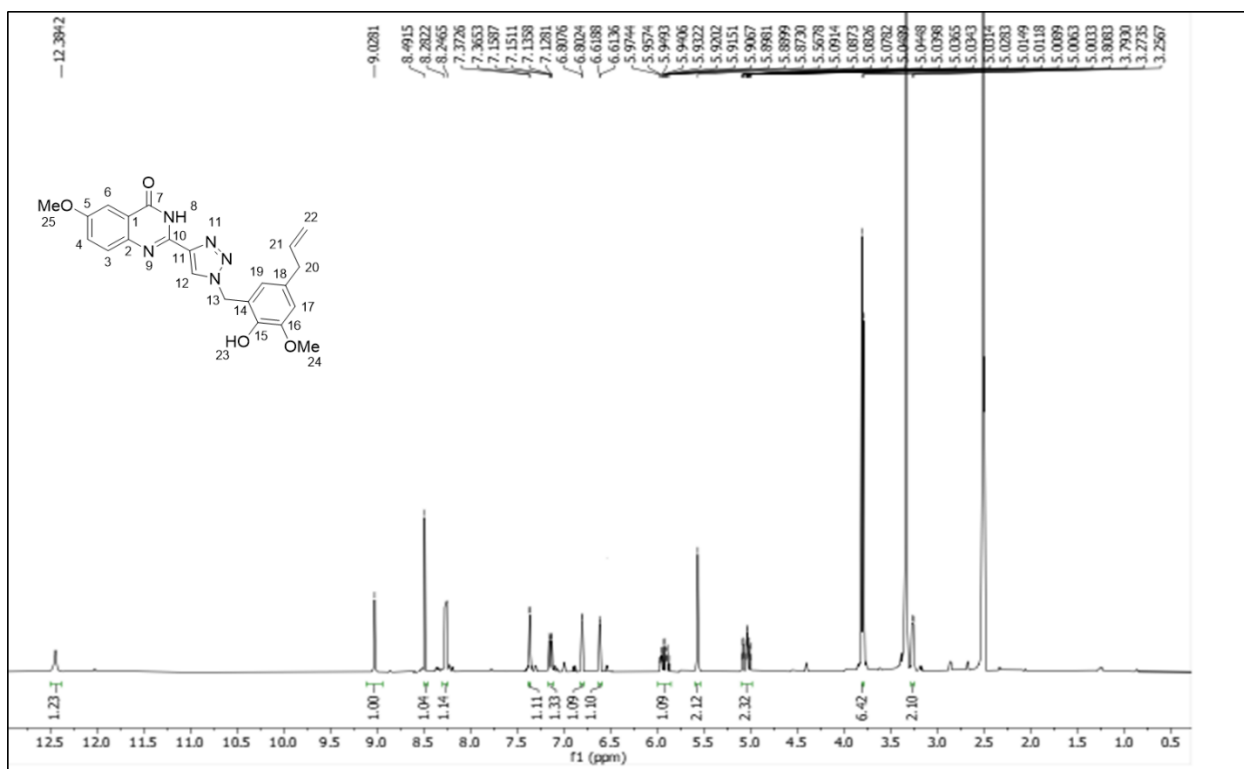**Figure S28.**  $^{13}\text{C}$  NMR Spectrum for Compound **10b** in  $\text{DMSO}-d_6$  (100 MHz)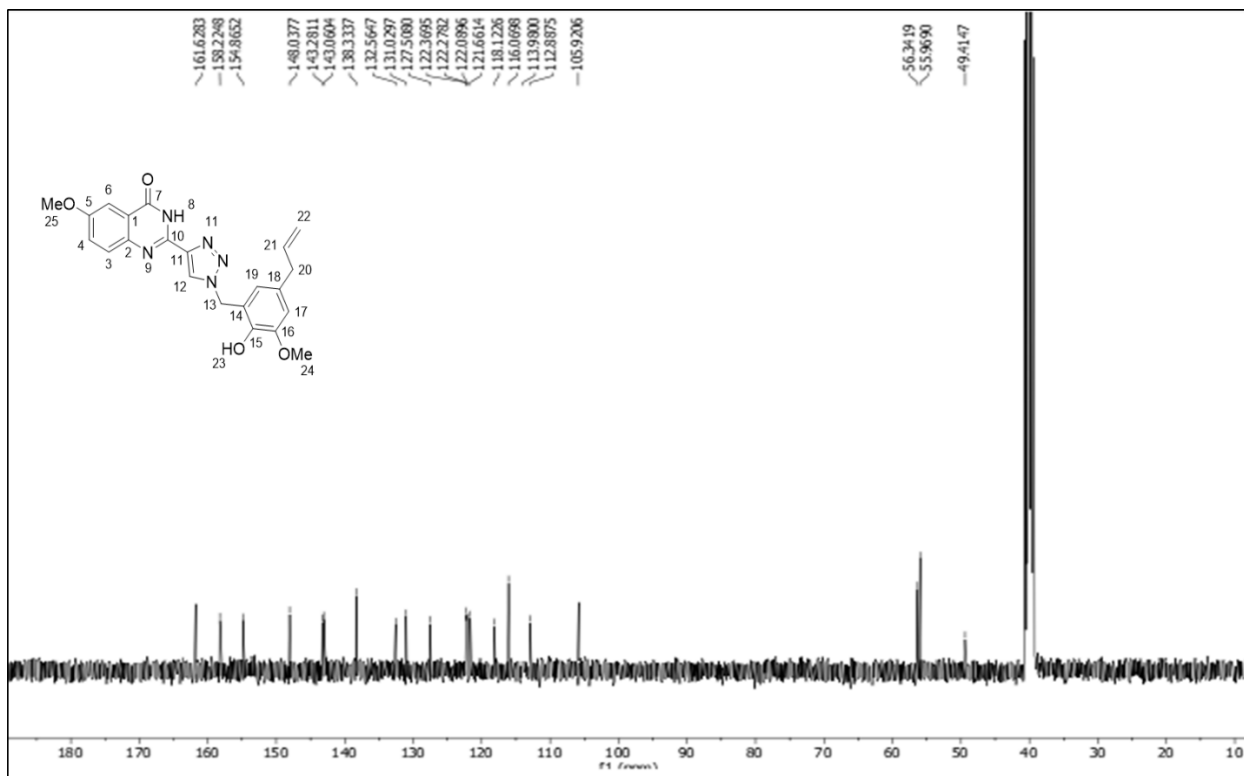

**Figure S29.** DEPT-135 Subspectrum for Compound **10b** in DMSO-*d*<sub>6</sub> (100 MHz)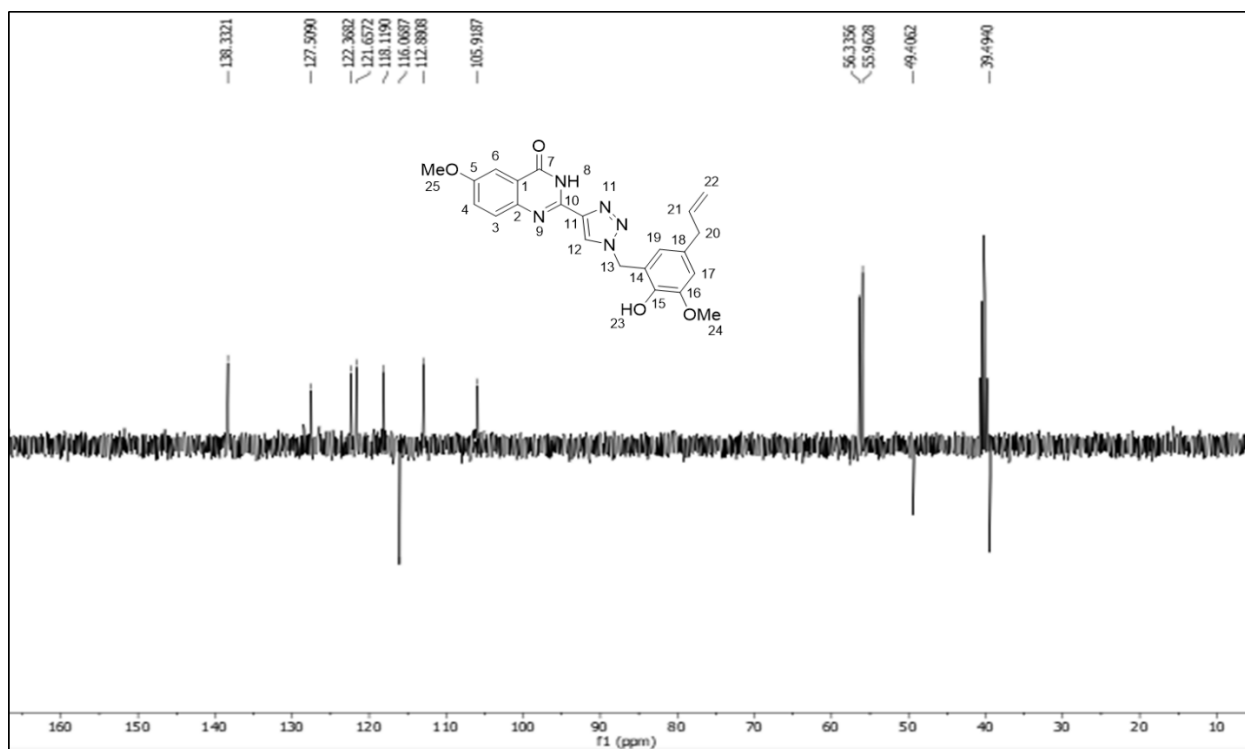**Figure S30.** ESI-HRMS Spectrum for Compound **10b**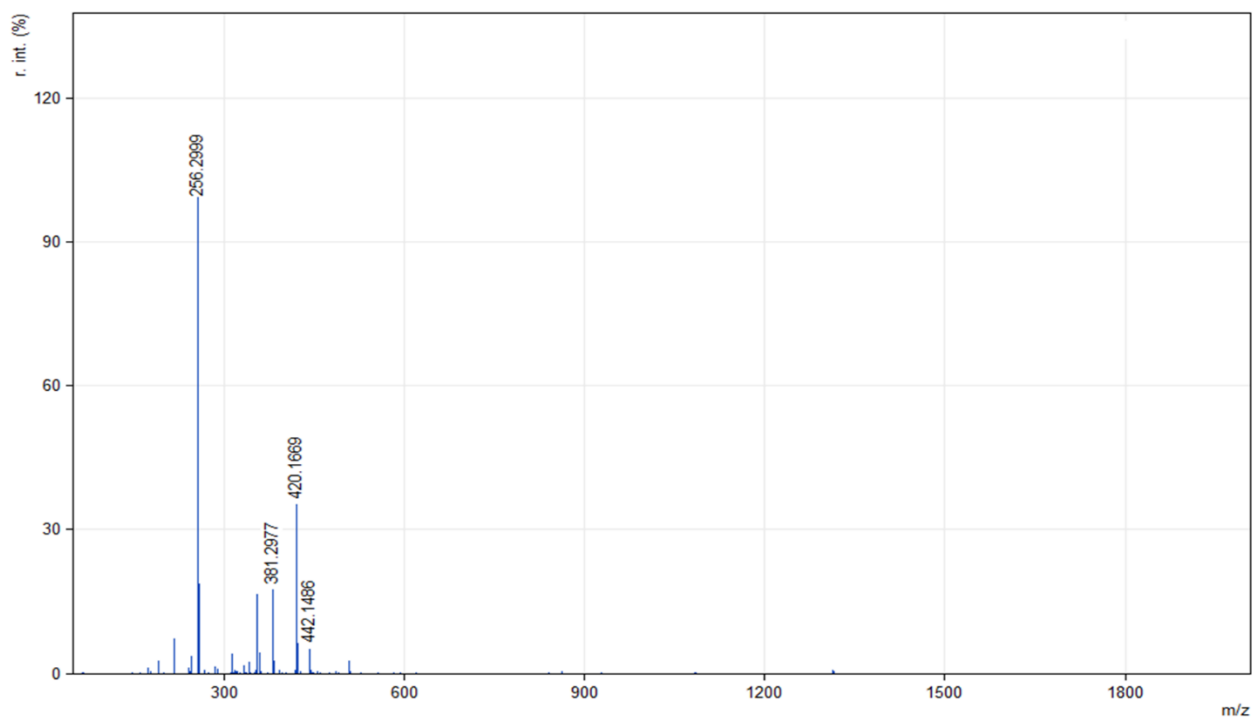

**Figure S31.**  $^1\text{H}$  NMR Spectrum for Compound **10c** in  $\text{DMSO}-d_6$  (400 MHz)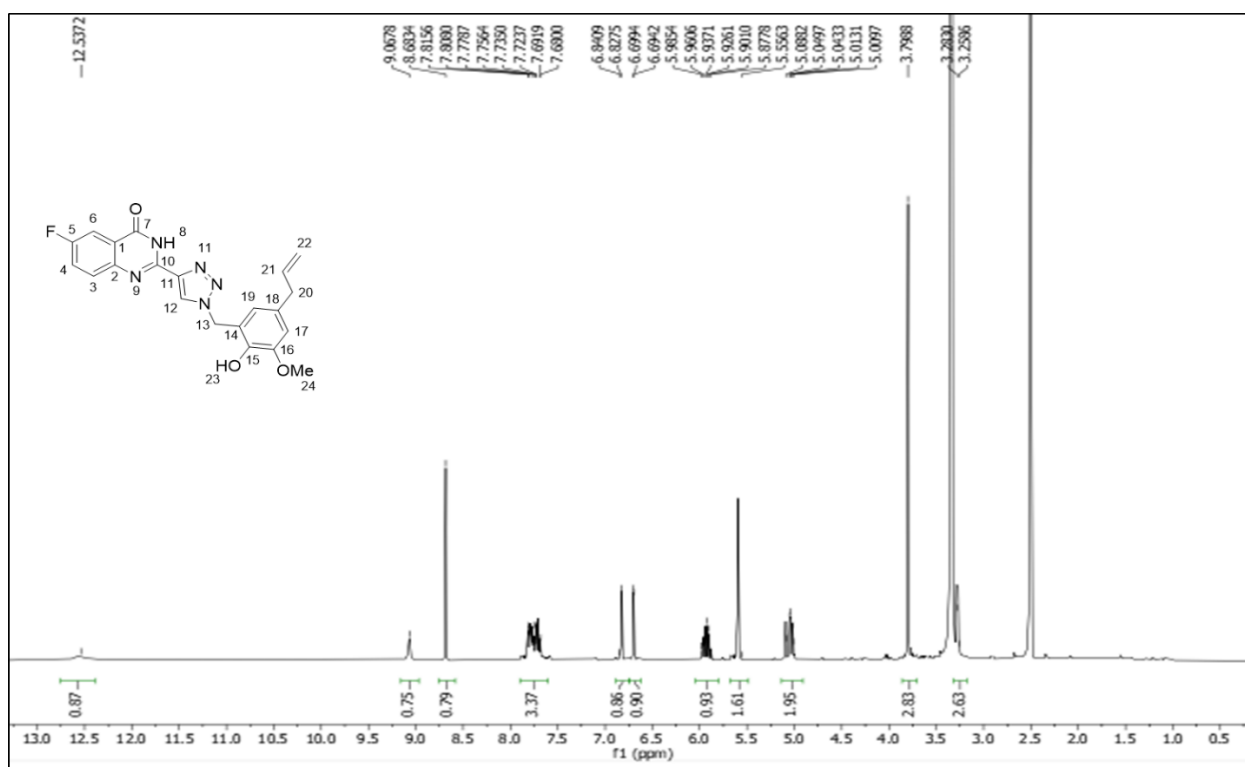**Figure S32.**  $^{13}\text{C}$  NMR Spectrum for Compound **10c** in  $\text{DMSO}-d_6$  (100 MHz)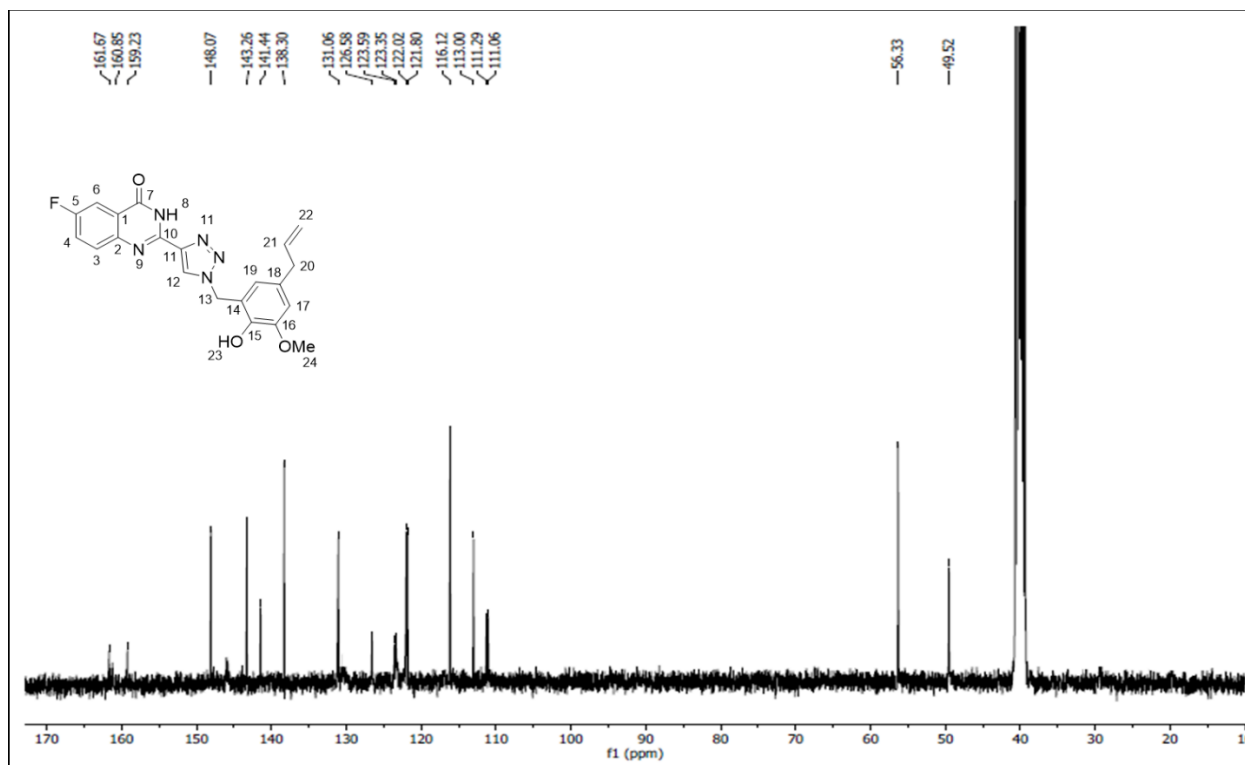

**Figure S33.** DEPT-135 Subspectrum for Compound **10c** in DMSO- $d_6$  (100 MHz)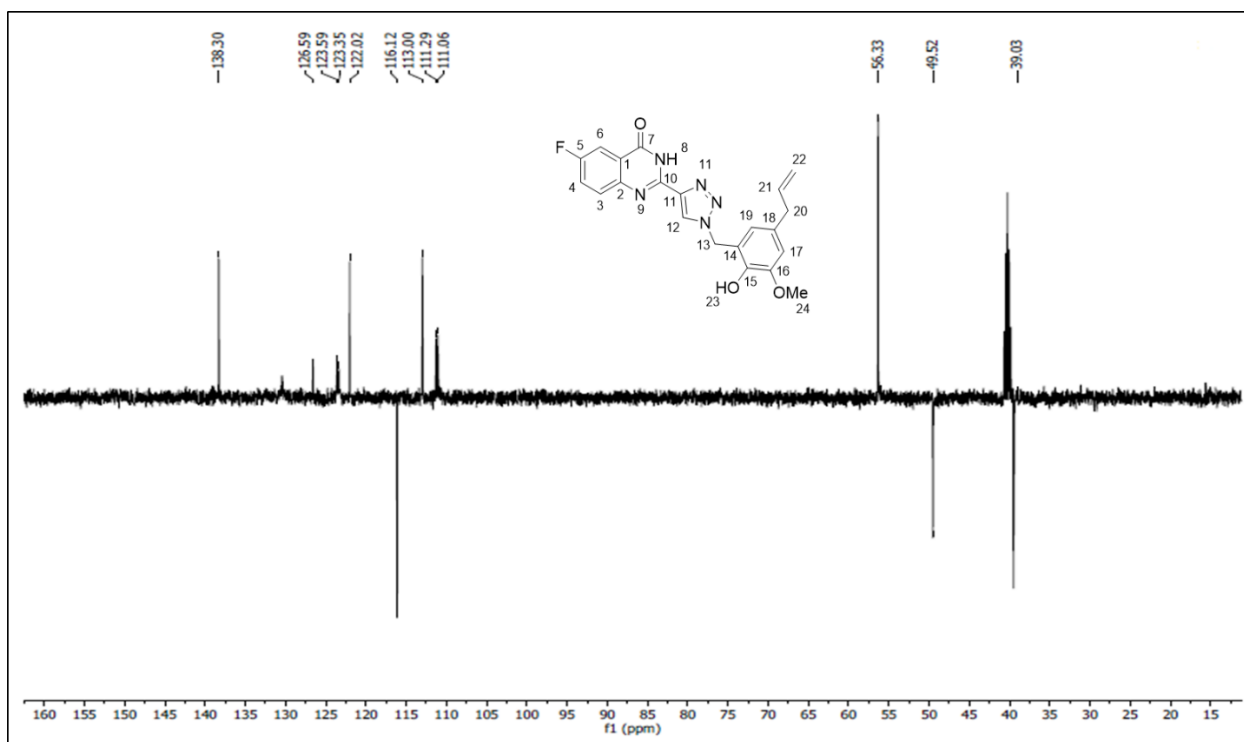**Figure S34.** ESI-HRMS Spectrum for Compound **10c**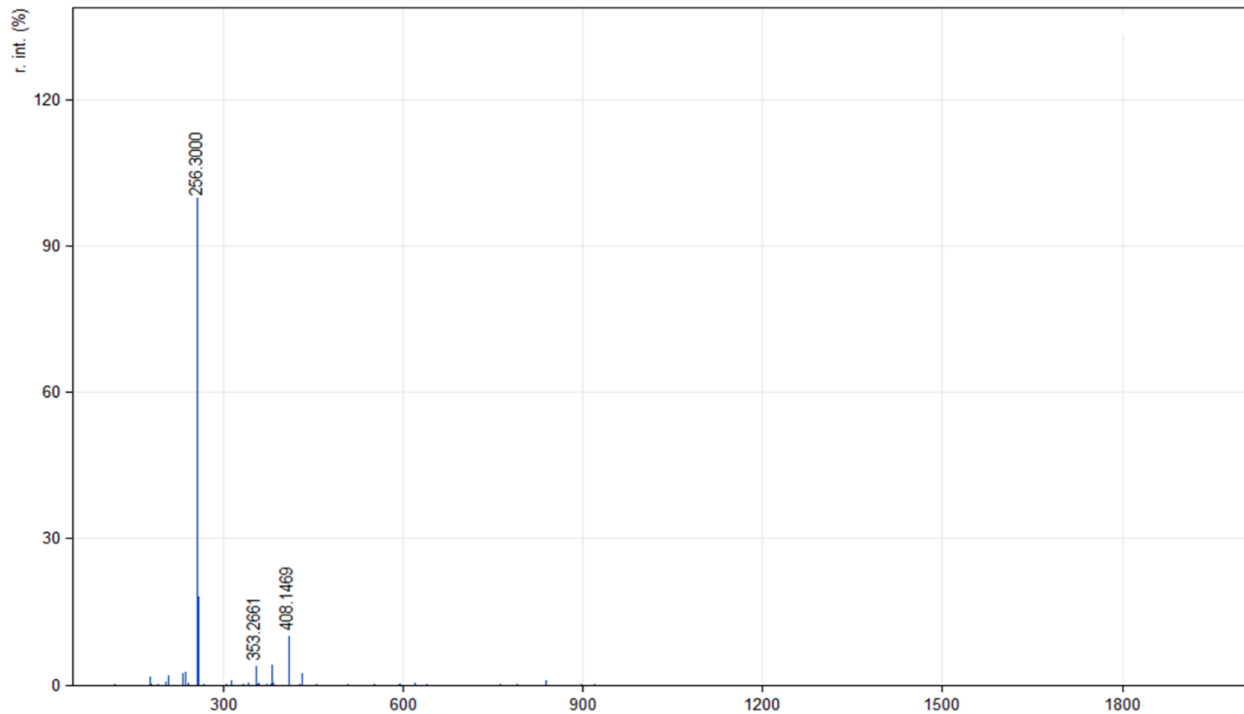

**Figure S35.**  $^1\text{H}$  NMR Spectrum for Compound **13** in  $\text{DMSO}-d_6$  (400 MHz)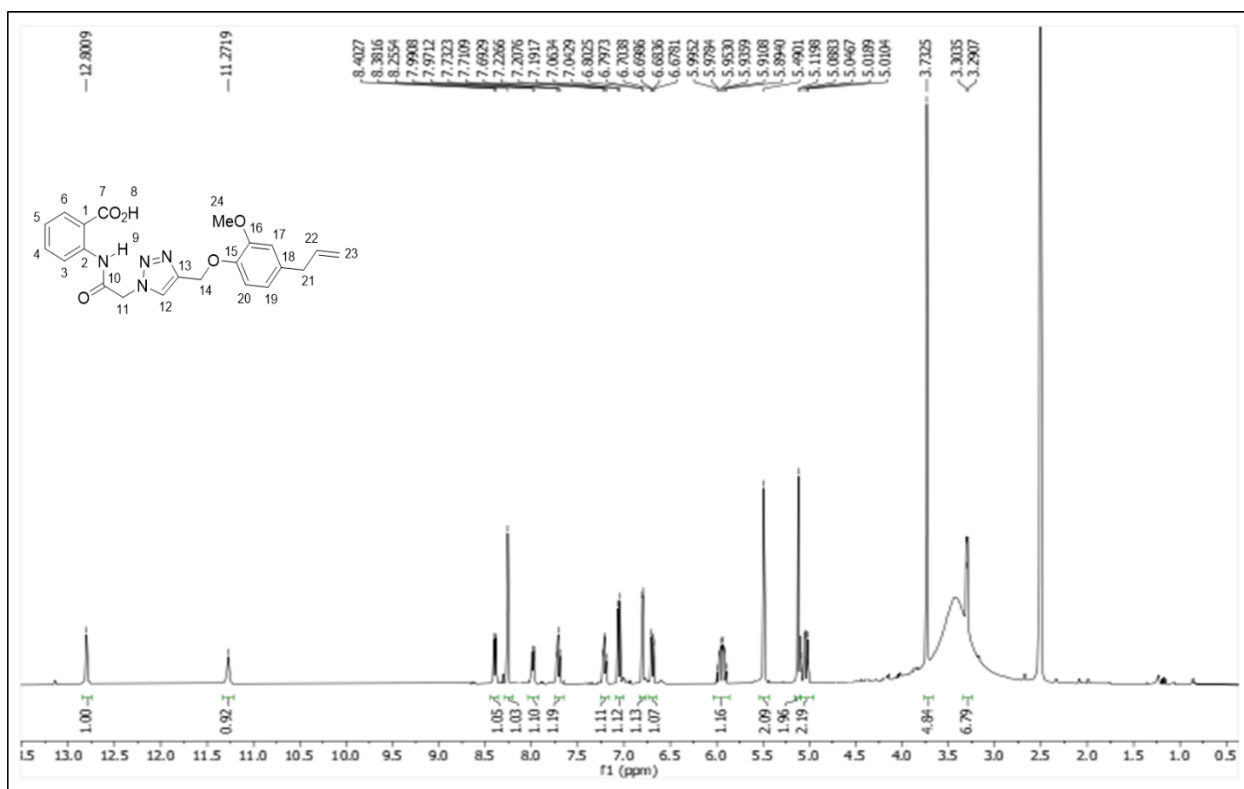**Figure S36.**  $^{13}\text{C}$  NMR Spectrum for Compound **13** in  $\text{DMSO}-d_6$  (100 MHz)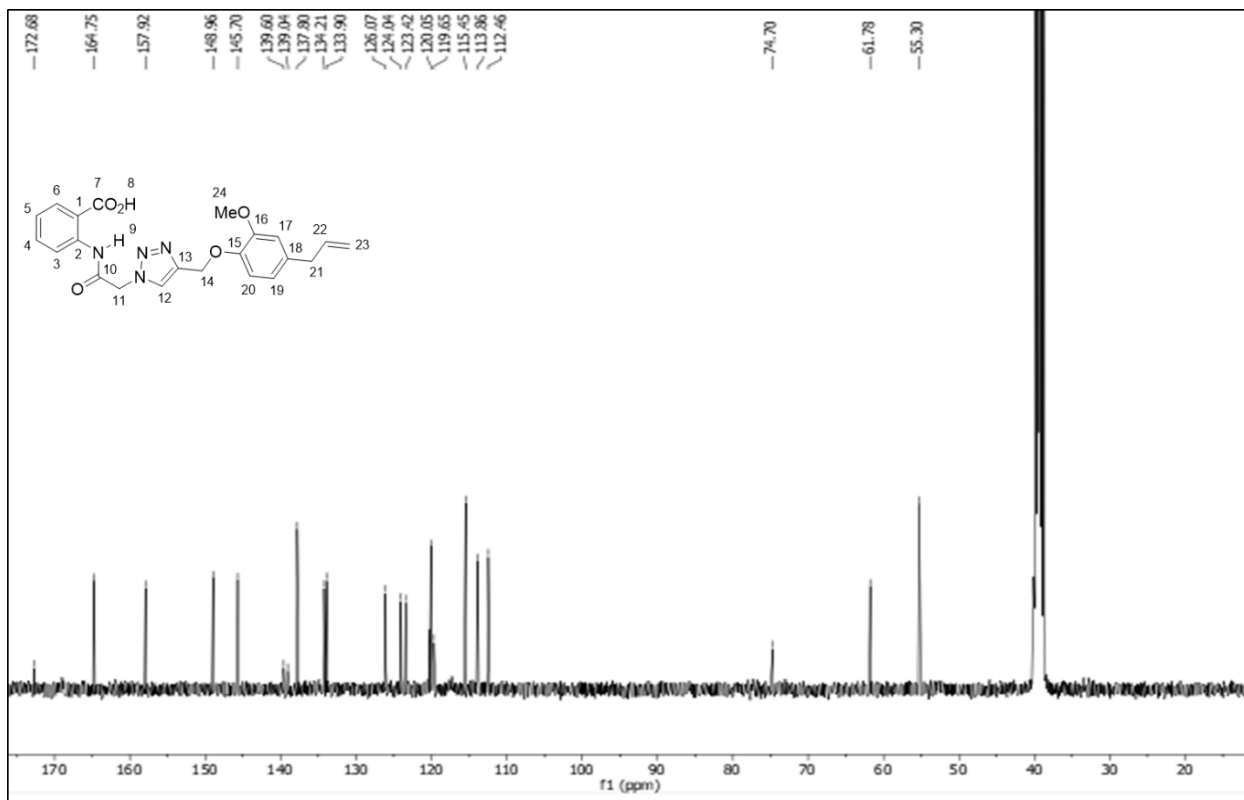

**Figure S37.** DEPT-135 Subspectrum for Compound **13** in DMSO- $d_6$  (100 MHz)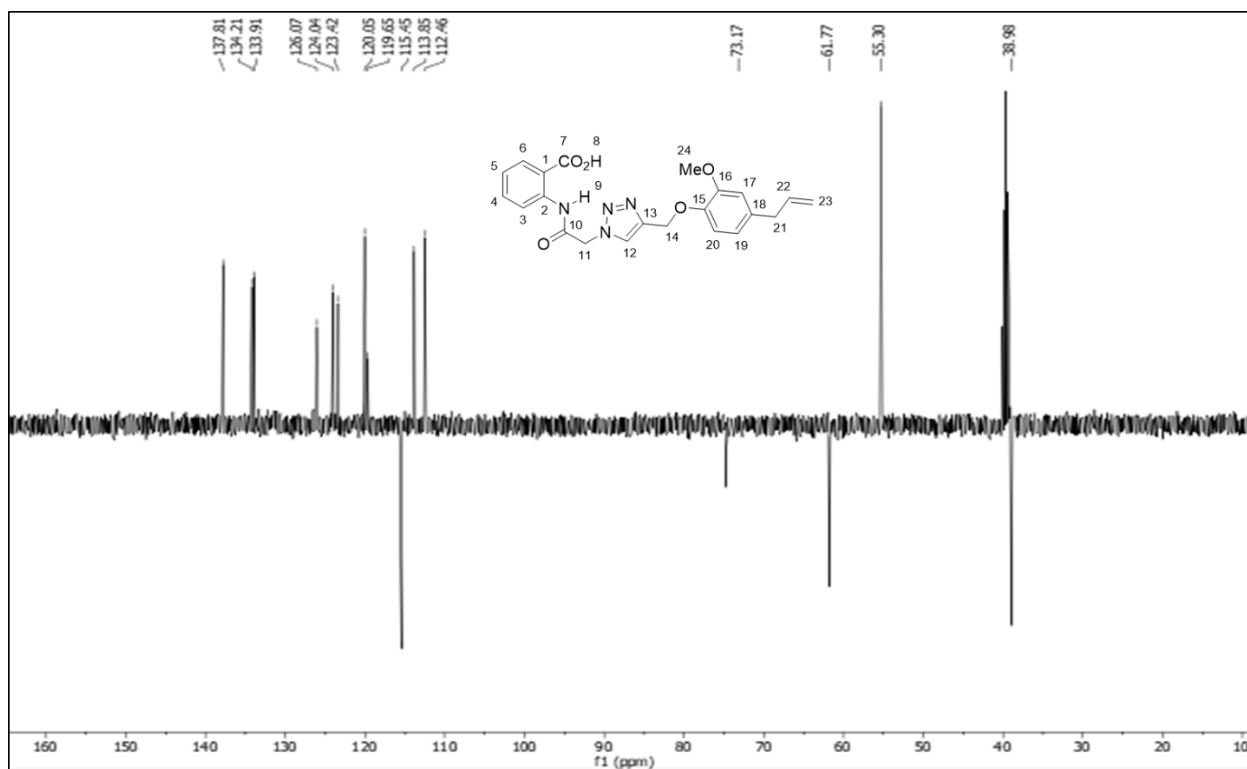**Figure S38.** ESI-HRMS Spectrum for Compound **13**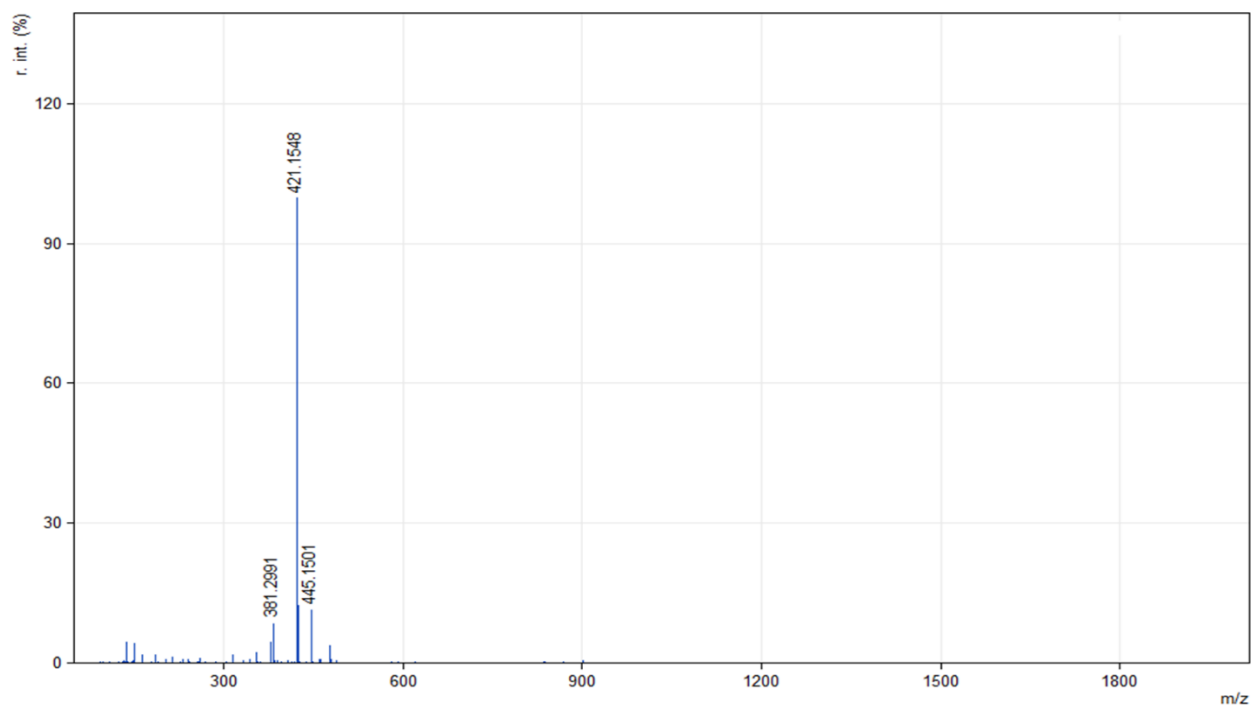

**Figure S39.**  $^1\text{H}$  NMR Spectrum for Compound **14** in  $\text{DMSO}-d_6$  (400 MHz)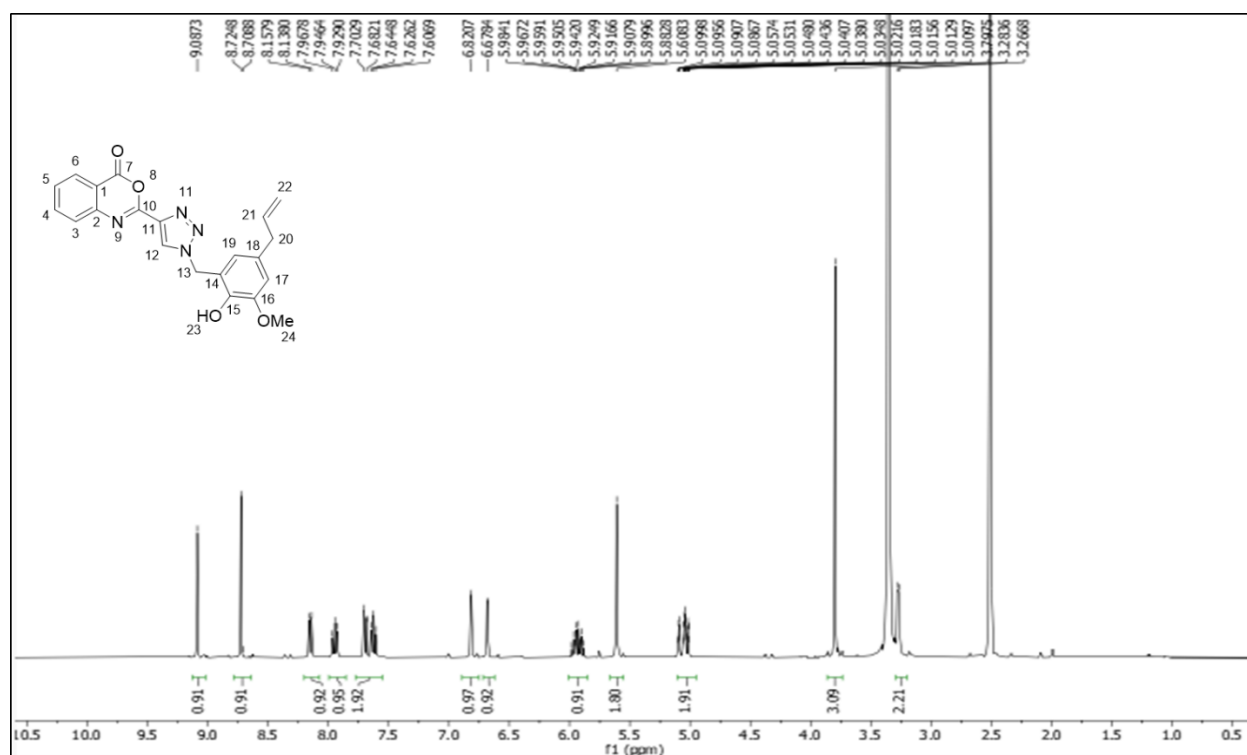**Figure S40.**  $^{13}\text{C}$  NMR Spectrum for Compound **14** in  $\text{DMSO}-d_6$  (100 MHz)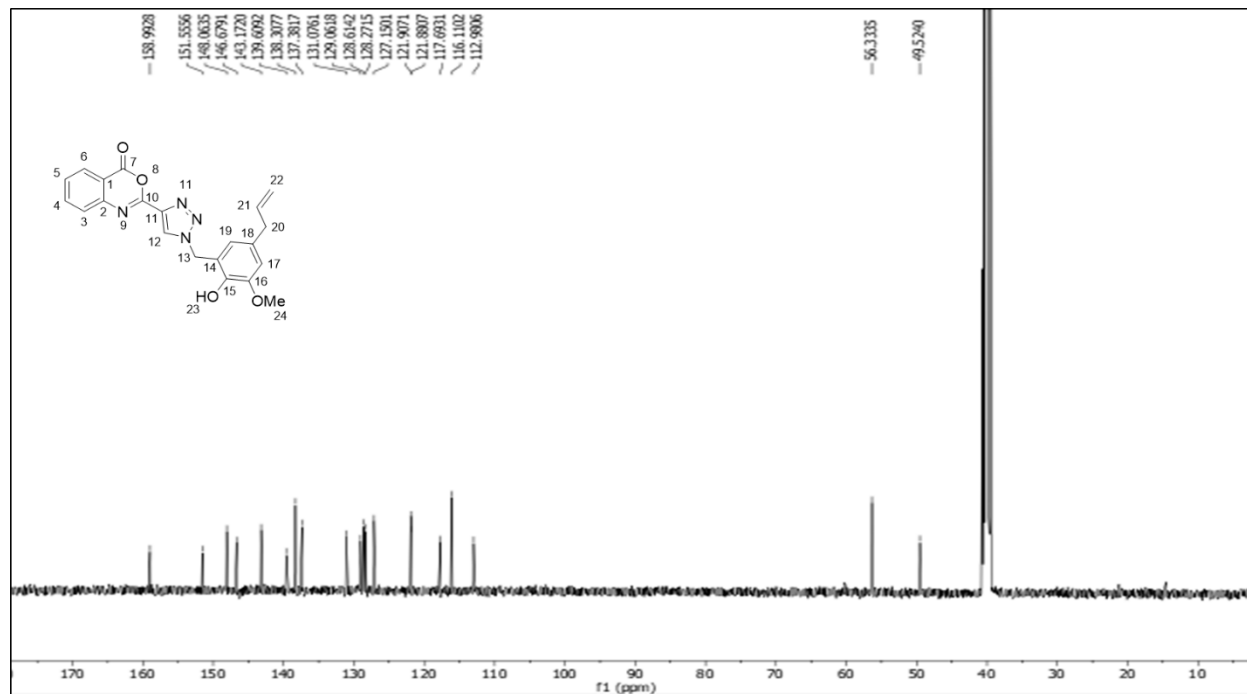

**Figure S41.** DEPT-135 Subspectrum for Compound **14** in DMSO-*d*<sub>6</sub> (100 MHz)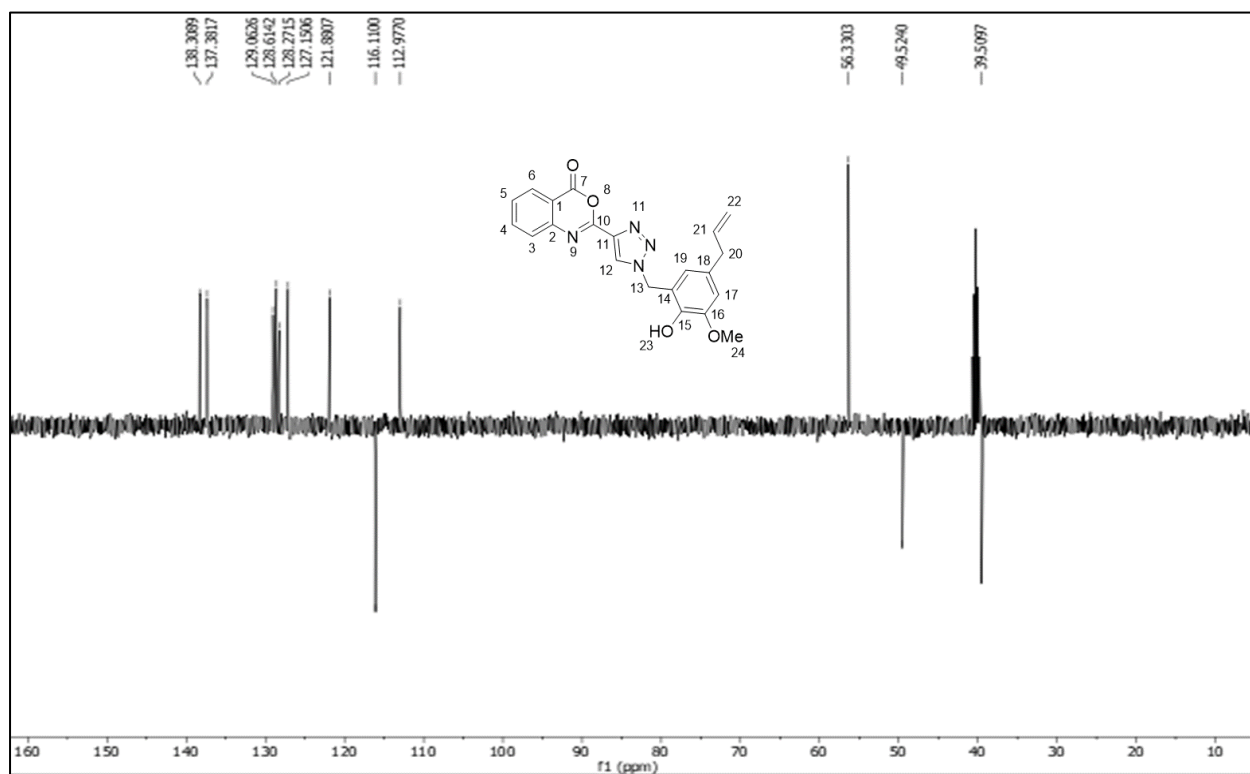**Figure S42.** ESI-HRMS Spectrum for Compound **14**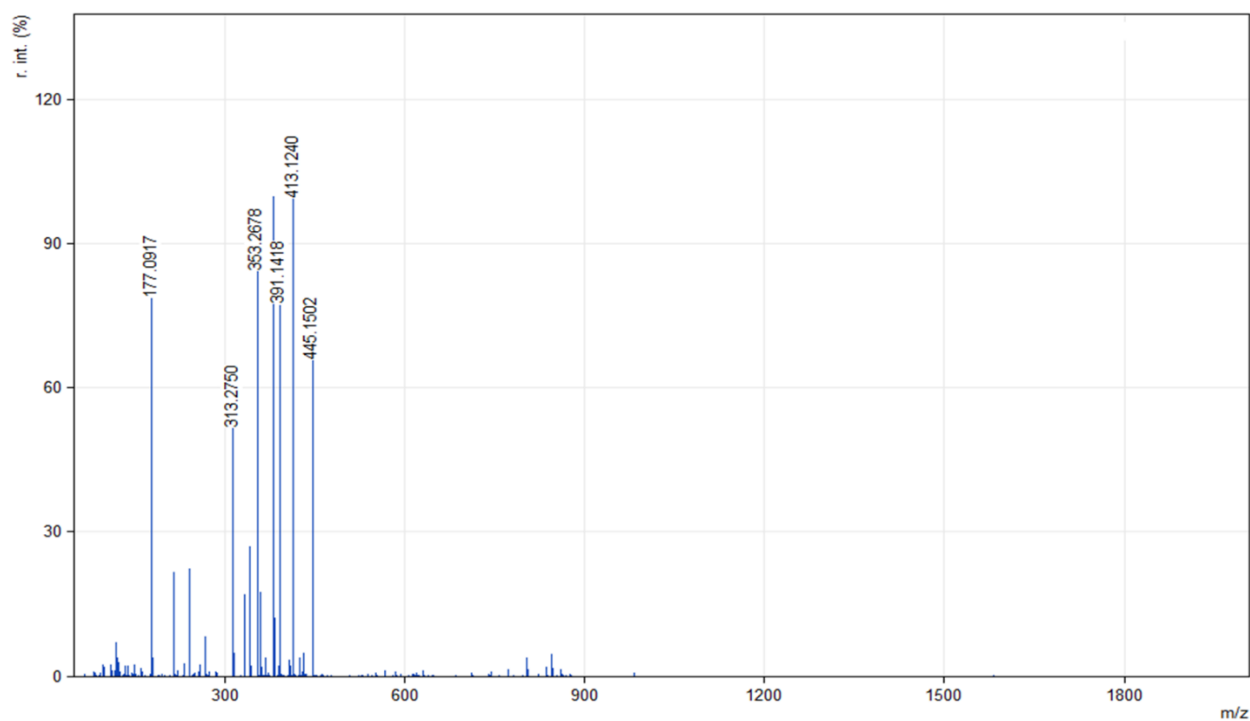



**Table S1.** Antimicrobial activity of compounds **9a-9d**, **10a-10c**, **13**, **14**, and **eugenol** against fungal strains: *Candida albicans*, *Aspergillus fumigatus* and *Trichophyton rubrum*, and against two bacteria strains: *Escherichia coli* and *Staphylococcus aureus*. The results of minimum inhibitory concentration (MIC) are expressed in µg/mL.

| Strains/Compounds | <i>C. albicans</i> | <i>T. rubrum</i> | <i>A. fumigatus</i> | <i>E. coli</i> | <i>S. aureus</i> |
|-------------------|--------------------|------------------|---------------------|----------------|------------------|
| <b>9a</b>         | >512               | 512              | >512                | >512           | >512             |
| <b>9b</b>         |                    | >512             |                     | 256-512        | 256              |
| <b>9c</b>         |                    |                  |                     |                |                  |
| <b>9d</b>         |                    | 512              |                     |                |                  |
| <b>10a</b>        |                    | >512             |                     |                |                  |
| <b>10b</b>        |                    | 512              |                     | >512           | >512             |
| <b>10c</b>        |                    | >512             |                     |                |                  |
| <b>13</b>         |                    | 256-512          |                     |                |                  |
| <b>14</b>         |                    |                  |                     |                |                  |
| <b>Eugenol</b>    | 512                | 256              | 512                 |                |                  |
